# Supplementary material for: Storyline analytical framework for understanding future severe low-water episodes and their consequences
Source: Copernicus journal article supplement (doi:10.5194/hess-29-4893-2025), 2025-10-01
Supplement: Supplementary file 1 [file hess-29-4893-2025-supplement.zip]

## Sheet: Intro
	Veuillez remplir les informations suivantes:
	Nom du répondant:
	No. de tel:
	Adresse courriel:
	Rôle:
	Organisation (OBV, Comité ZIP):
	CASCADES est un projet partenarial financé par le gouvernement du Québec pour le soutien à la recherche en adaptation aux changements climatiques, dans le cadre de la mise en œuvre du Plan pour une économie verte 2030.
	Groupe AGÉCO	Experts en gestion d’équipes multidisciplinaires
	Nada Conseils	Experts en économie des changements climatiques
	T2 Environnement	Experts en caractérisation des milieux humides, biodiversité et restauration écologique

## Sheet: Identification Épisode 
	Listes d'épisodes	Nom de l'épisode	Année de début de l'épisode	Mois de début de l'épisode	Mois de fin de l'épisode	Eaux concernées		Des conséquences sur les usages anthropiques/bien-être des populations ont-elles été identifiées/documentées	Comment évalueriez-vous leur sévérité globale ? De 0 (Aucune conséquence/Ne sait pas) à 4 (Très sévère)	Des conséquences sur la santé des écosystèmes ont-elles été identifiées/documentées?	Comment évalueriez-vous leur sévérité globale ? De 0 (Aucune conséquence/Ne sait pas) à 4 (Très sévère)		Calul du rang
Rang						Surface	Souterraine								Total	Rang
1	Épisode 1												0	0	0	1
1	Épisode 2												0	0	0	1
1	Épisode 3												0	0	0	1
1	Épisode 4												0	0	0	1
1	Épisode 5												0	0	0	1
1	Épisode 6												0	0	0	1
1	Épisode 7												0	0	0	1
1	Épisode 8												0	0	0	1
1	Épisode 9												0	0	0	1
1	Épisode 10												0	0	0	1
						0		0
						Selon les niveaux de sévérité identifiés, vous serez questionné(e) sur les épisodes suivants:
					10		(onglet A)
					9		(onglet B)
					8		(onglet C)
						Si cette sélection ne vous convient pas, veuillez ajuster les niveaux de sévérité dans le tableau ci-dessus.
						Cette sélection restera inchangée tout au long de la complétion du questionnaire.

## Sheet: A
			Les questions suivantes sont pour l'épisode de de l'année
			1. Pouvez-vous fournir une courte description de cet épisode ?			Vous n'avez pas identifié d'épisode, veuillez passer à l'onglet Pour retourner
								10
			2. Quel(s) lac(s), milieu(x) humide(s), rivière(s) ou source d’eau souterraine ont été touché(s)?
			3. Quelle(s) entité(s) administrative(s) de votre territoire a/ont été touchée(s) ? Écrire le nom de la ou des MRC, municipalité(s)
			4. À votre connaissance, quelles étaient les causes principales de cet épisode de manque d’eau sévère?
			Causes principales de cet épisode de manque d'eau sévère	Oui/Non/NSP
			Étiage sévère
			Bas niveau de la nappe phréatique.
			Surconsommation d'eau			Précisez le type de prélèvement (agricole, résidentiel, industriel)...)
			Période prolongée de sécheresse (> 1 saison)
			Période chaude et sèche de plus courte durée (<1 saison)
			Faible quantité de neige
			Arrivée hâtive du printemps
			Déficit pluviométrique
			Enjeux géomorphologiques liés à l'écoulement de la rivière (ex. : modification du tracé de la rivière en raison de l'étiage)
			Gestion inadaptée des variations de niveaux d’eau
			Réseau de distribution d'eau vétust
			Développement immobilier / étalement urbain/ réseaux routiers
			Autre			Spécifiez:
			Autre			Spécifiez:
			Autre			Spécifiez:
			5. À votre connaissance, quels sont les paramètres ayant été affectés par le manque d’eau sévère?
			Paramètres	Surface		Souterraine		Précisez au besoin
			Débit dans le cours d’eau
			Niveau d’eau dans les puits
			Niveau d'eau dans le lac ou le milieu humide
			Qualité chimique ou biologique de l’eau
			Qualité visuelle de l’eau
			Température de l’eau
			Autres paramètres (ex. : odeur, couleur, goût, etc.)" (spécifier)
			Conséquences sur les usages anthropiques et le bien-être/santé des populations de l'année
			6. Est-ce que cet épisode de manque d'eau sévère a eu des conséquences sur les usages anthropiques et le bien-être/santé des populations ? (ex. : conflits d’usage entre différents utilisateurs)
						Passer à la question 11
			7. Si oui, quelles ont été les conséquences ?
			Conséquences de cet épisode de manque d'eau sévère sur les usages anthropiques, le bien-être/santé des populations	Oui/Non/NSP
			Problèmes d'approvisionnement en eau potable
			Conflits d'usage entre différents utilisateurs*			Précisez les usages/utilisateurs concernés*:
			Pertes de récoltes agricoles
			Restrictions d'usage (ex. :reliées à l'industrie récréo-touristique, navigation commerciale)
			Pertes économiques pour l'activité industrielle
			Pertes économiques pour l'activité fluviale
			Altération de la qualité de l'eau potable (odeur, couleur, goût, etc.)
			Augmentation du risque sanitaire pour la consommation humaine (contamination microbiologique ou chimique)			Précisez le type de risque (ex. : microbiologique, chimique, autres)
			Augmentation des coûts de traitement reliés aux sources d'eau potable (baisse du facteur de dilution)
			Augmentation des risques d'incendies / incapacité à les combattre
			Pertes de production hydroélectrique
			Dommages aux infrastructures (ex. : lié à l'érosion ou à l'affaissement de la nappe phréatique)
			Autre			Spécifiez:
			Autre			Spécifiez:
			Autre			Spécifiez:
			8. Pour chacune des conséquences identifiées, pouvez-vous évaluer sa sévérité sur une échelle de 1-4 (De 1 -Peu sévère à 4 -Très sévère)
			Conséquences de cet épisode de manque d'eau sévère sur les usages anthropiques, le bien-être/santé des populations	Sévérité de la conséquence		Pouvez-vous nous donner une description de ces conséquences ?
		1
		2
		3
		4
		5
		6
		7
		8
		9
		10
		11
		12
		13
		14
		15
			8.a. À votre connaissance, quels ont été les usagers de l'eau les plus affectés par ces conséquences ? (ex. : centres urbains, zones rurales, populations desservies par des puits privés ou petits réseaux, aînés…). Pourquoi ?
			9. S'il y a lieu, quelles sont les mesures d'adaptation qui ont été prises en lien avec ces conséquences ?
			Conséquences sur les écosystèmes pour l'épisode de de l'année
			10. Est-ce que cet épisode de manque d'eau sévère a eu des conséquences sur les écosystèmes ?
						Passer à la question à la section suivante
			11.Quelles ont été les conséquences de cet épisode de manque d'eau sévère sur les écosystèmes ?
			Conséquences de cet épisode de manque d'eau sévère sur les écosystèmes	Oui/Non/NSP
			Propagation d’espèces exotiques envahissantes (EEE)
			Baisse de diversité (végétaux indigènes)
			Baisse de population des poissons d’eau douce
			Réduction des populations d’oiseaux
			Circulation limitée des espèces aquatiques
			Dégradation des milieux humides
			Contaminations microbiologiques
			Eutrophisation / présence de cyanobactérie
			Érosion des berges et des rives
			Pollution accentuée des cours d'eau
			Épisode de mortalité importante de poissons
			Contamination chimique
			Autre			Spécifiez:
			Autre			Spécifiez:
			Autre			Spécifiez:
		1
		2	12.Pour chacune des conséquences identifiées, pouvez-vous évaluer sa sévérité sur une échelle de 1-4 (De 1 -Peu sévère à 4 -Très sévère)
		3	Conséquences de cet épisode de manque d'eau sévère sur les écosystèmes	Sévérité de la conséquence		Pouvez-vous nous donner une description de ces conséquences ?
		1
		2
		3
		4
		5
		6
		7
		8
		9
		10
		11
		12
		13
		14
		15
		14				38
			13. S'il y a lieu, quelles sont les mesures d'adaptation qui ont été prises en lien avec ces conséquences ?
			Autres commentaires généraux sur l'épisode de de l'année
			14. Avez-vous d'autres commentaires à soulever sur cet épisode?
		15. Il est possible que nous souhaiterions approfondir les connaissances sur les conséquences de cet épisode de manque d'eau sévère dans la phase 2 du projet CASCADES (2023-2024). Dans cette éventualité, quels sont les intervenants avec qui nous devrions prendre contact ? (Organismes, municipalités, personnes-ressources, etc.) Si vous avez les coordonnées d'organisations et/ou d'individus avec qu…
			Contact 1
			Organisation :
			Prénom et Nom :
			Rôle :
			Courriel :
			No de tel :
			Contact 2
			Organisation :
			Prénom et Nom :
			Rôle :
			Courriel :
			No de tel :
			Contact 3
			Organisation :
			Prénom et Nom :
			Rôle :
			Courriel :
			No de tel :

## Sheet: B
			Les questions suivantes sont pour l'épisode de de l'année
			1. Pouvez-vous fournir une courte description de cet épisode ?			Vous avez identifié 1 seul épisode, veuillez passer à l'onglet Pour retourner
								9
			2. Quel(s) lac(s), milieu(x) humide(s), rivière(s) ou source d’eau souterraine ont été touché(s)?
			3. Quelle(s) entité(s) administrative(s) de votre territoire a/ont été touchée(s) ? Écrire le nom de la ou des MRC, municipalité(s)
			4. À votre connaissance, quelles étaient les causes principales de cet épisode de manque d’eau sévère?
			Causes principales de cet épisode de manque d'eau sévère	Oui/Non/NSP
			Étiage sévère
			Bas niveau de la nappe phréatique.
			Surconsommation d'eau			Précisez le type de prélèvement (agricole, résidentiel, industriel)...)
			Période prolongée de sécheresse (> 1 saison)
			Période chaude et sèche de plus courte durée (<1 saison)
			Faible quantité de neige
			Arrivée hâtive du printemps
			Déficit pluviométrique
			Enjeux géomorphologiques liés à l'écoulement de la rivière (ex. : modification du tracé de la rivière en raison de l'étiage)
			Gestion inadaptée des variations de niveaux d’eau
			Réseau de distribution d'eau vétust
			Développement immobilier / étalement urbain/ réseaux routiers
			Autre			Spécifiez:
			Autre			Spécifiez:
			Autre			Spécifiez:
			5. À votre connaissance, quels sont les paramètres ayant été affectés par le manque d’eau sévère?
			Paramètres	Surface		Souterraine		Précisez au besoin
			Débit dans le cours d’eau
			Niveau d’eau dans les puits
			Niveau dans le lac ou le milieu humide
			Qualité chimique ou biologique de l’eau
			Qualité visuelle de l’eau
			Température de l’eau
			Autres paramètres (ex. : odeur, couleur, goût, etc.)" (spécifier)
			Conséquences sur les usages anthropiques et le bien-être/santé des populations de l'année
			6. Est-ce que cet épisode de manque d'eau sévère a eu des conséquences sur les usages anthropiques et le bien-être/santé des populations ? (ex. : conflits d’usage entre différents utilisateurs)
						Passer à la question 11
			7. Si oui, quelles ont été les conséquences ?
			Conséquences de cet épisode de manque d'eau sévère sur les usages anthropiques, le bien-être/santé des populations	Oui/Non/NSP
			Problèmes d'approvisionnement en eau potable
			Conflits d'usage entre différents utilisateurs*			Précisez les usages/utilisateurs concernés*:
			Pertes de récoltes agricoles
			Restrictions d'usage (ex. :reliées à l'industrie récréo-touristique, navigation commerciale)
			Pertes économiques pour l'activité industrielle
			Pertes économiques pour l'activité fluviale
			Altération de la qualité de l'eau potable (odeur, couleur, goût, etc.)
			Augmentation du risque sanitaire pour la consommation humaine (contamination microbiologique ou chimique)			Précisez le type de risque (ex. : microbiologique, chimique, autres)
			Augmentation des coûts de traitement reliés aux sources d'eau potable (baisse du facteur de dilution)
			Augmentation des risques d'incendies / incapacité à les combattre
			Pertes de production hydroélectrique
			Dommages aux infrastructures (ex. : lié à l'érosion ou à l'affaissement de la nappe phréatique)
			Autre			Spécifiez:
			Autre			Spécifiez:
			Autre			Spécifiez:
								Précisez au besoin:
			8. Pour chacune des conséquences identifiées, pouvez-vous évaluer sa sévérité sur une échelle de 1-4 (De 1 -Peu sévère à 4 -Très sévère)
			Conséquences de cet épisode de manque d'eau sévère sur les usages anthropiques, le bien-être/santé des populations	Sévérité de la conséquence		Pouvez-vous nous donner une description de ces conséquences ?
		1
		2
		3
		4
		5
		6
		7
		8
		9
		10
		11
		12
		13
		14
		15
			8.a. À votre connaissance, quels ont été les usagers de l'eau les plus affectés par ces conséquences ? (ex. : centres urbains, zones rurales, populations desservies par des puits privés ou petits réseaux, aînés…). Pourquoi ?
			9. S'il y a lieu, quelles sont les mesures d'adaptation qui ont été prises en lien avec ces conséquences ?
			Conséquences sur les écosystèmes pour l'épisode de de l'année
			10. Est-ce que cet épisode de manque d'eau sévère a eu des conséquences sur les écosystèmes
						Passer à la question à la section suivante
			11.Quelles ont été les conséquences de cet épisode de manque d'eau sévère sur les écosystèmes ?
			Conséquences de cet épisode de manque d'eau sévère sur les écosystèmes	Oui/Non/NSP
			Propagation d’espèces exotiques envahissantes (EEE)
			Baisse de diversité (végétaux indigènes)
			Baisse de population des poissons d’eau douce
			Réduction des populations d’oiseaux
			Circulation limitée des espèces aquatiques
			Dégradation des milieux humides
			Contaminations microbiologiques
			Eutrophisation / présence de cyanobactérie
			Érosion des berges et des rives
			Pollution accentuée des cours d'eau
			Épisode de mortalité importante de poissons
			Contamination chimique
			Autre			Spécifiez:
			Autre			Spécifiez:
			Autre			Spécifiez:
		1
		2	12.Pour chacune des conséquences identifiées, pouvez-vous évaluer sa sévérité sur une échelle de 1-4 (De 1 -Peu sévère à 4 -Très sévère)
		3	Conséquences de cet épisode de manque d'eau sévère sur les écosystèmes	Sévérité de la conséquence		Pouvez-vous nous donner une description de ces conséquences ?
		1
		2
		3
		4
		5
		6
		7
		8
		9
		10
		11
		12
		13
		14
		15
			13. S'il y a lieu, quelles sont les mesures d'adaptation qui ont été prises en lien avec ces conséquences ?
			Autres commentaires généraux sur l'épisode de de l'année
			14. Avez-vous d'autres commentaires à soulever sur cet épisode?
		15. Il est possible que nous souhaiterions approfondir les connaissances sur les conséquences de cet épisode de manque d'eau sévère dans la phase 2 du projet CASCADES (2023-2024). Dans cette éventualité, quels sont les intervenants avec qui nous devrions prendre contact ? (Organismes, municipalités, personnes-ressources, etc.) Si vous avez les coordonnées d'organisations et/ou d'individus avec qu…
			Contact 1
			Organisation :
			Prénom et Nom :
			Rôle :
			Courriel :
			No de tel :
			Contact 2
			Organisation :
			Prénom et Nom :
			Rôle :
			Courriel :
			No de tel :
			Contact 3
			Organisation :
			Prénom et Nom :
			Rôle :
			Courriel :
			No de tel :
				d

## Sheet: C
			Les questions suivantes sont pour l'épisode de de l'année
			1. Pouvez-vous fournir une courte description de cet épisode ?			Vous avez identifié seulement 2 épisodes, veuillez passer à l'onglet Pour retourner
								8
			2. Quel(s) lac(s), milieu(x) humide(s), rivière(s) ou source d’eau souterraine ont été touché(s)?
			3. Quelle(s) entité(s) administrative(s) de votre territoire a/ont été touchée(s) ? Écrire le nom de la ou des MRC, municipalité(s)
			4. À votre connaissance, quelles étaient les causes principales de cet épisode de manque d’eau sévère?
			Causes principales de cet épisode de manque d'eau sévère	Oui/Non/NSP
			Étiage sévère
			Bas niveau de la nappe phréatique.
			Surconsommation d'eau			Précisez le type de prélèvement (agricole, résidentiel, industriel)
			Période prolongée de sécheresse (> 1 saison)
			Période chaude et sèche de plus courte durée (<1 saison)
			Faible quantité de neige
			Arrivée hâtive du printemps
			Déficit pluviométrique
			Enjeux géomorphologiques liés à l'écoulement de la rivière (ex. : modification du tracé de la rivière en raison de l'étiage)
			Gestion inadaptée des variations de niveaux d’eau
			Réseau de distribution d'eau vétust
			Développement immobilier / étalement urbain/ réseaux routiers
			Autre			Spécifiez:
			Autre			Spécifiez:
			Autre			Spécifiez:
			5. À votre connaissance, quels sont les paramètres ayant été affectés par le manque d’eau sévère?
			Paramètres	Surface		Souterraine		Précisez au besoin
			Débit dans le cours d’eau
			Niveau d’eau dans les puits
			Niveau dans le lac ou le milieu humide
			Qualité chimique ou biologique de l’eau
			Qualité visuelle de l’eau
			Température de l’eau
			Autres paramètres (ex. : odeur, couleur, goût, etc.)" (spécifier)
			Conséquences sur les usages anthropiques et le bien-être/santé des populations de l'année
			6. Est-ce que cet épisode de manque d'eau sévère a eu des conséquences sur les usages anthropiques et le bien-être/santé des populations ? (ex. : conflits d’usage entre différents utilisateurs)
						Passer à la question 11
			7. Si oui, quelles ont été les conséquences ?
			Conséquences de cet épisode de manque d'eau sévère sur les usages anthropiques, le bien-être/santé des populations	Oui/Non/NSP
			Problèmes d'approvisionnement en eau potable
			Conflits d'usage entre différents utilisateurs*			Précisez les usages/utilisateurs concernés*:
			Pertes de récoltes agricoles
			Restrictions d'usage (ex. :reliées à l'industrie récréo-touristique, navigation commerciale)
			Pertes économiques pour l'activité industrielle
			Pertes économiques pour l'activité fluviale
			Altération de la qualité de l'eau potable (odeur, couleur, goût, etc.)
			Augmentation du risque sanitaire pour la consommation humaine (contamination microbiologique ou chimique)			Précisez le type de risque (ex. : microbiologique, chimique, autres)
			Augmentation des coûts de traitement reliés aux sources d'eau potable (baisse du facteur de dilution)
			Augmentation des risques d'incendies / incapacité à les combattre
			Pertes de production hydroélectrique
			Dommages aux infrastructures (ex. : lié à l'érosion ou à l'affaissement de la nappe phréatique)
			Autre			Spécifiez:
			Autre			Spécifiez:
			Autre			Spécifiez:
								Précisez au besoin:
			8. Pour chacune des conséquences identifiées, pouvez-vous évaluer sa sévérité sur une échelle de 1-4 (De 1 -Peu sévère à 4 -Très sévère)
			Conséquences de cet épisode de manque d'eau sévère sur les usages anthropiques, le bien-être/santé des populations	Sévérité de la conséquence		Pouvez-vous nous donner une description de ces conséquences ?
		1
		2
		3
		4
		5
		6
		7
		8
		9
		10
		11
		12
		13
		14
		15
			8.a. À votre connaissance, quels ont été les usagers de l'eau les plus affectés par ces conséquences ? (ex. : centres urbains, zones rurales, populations desservies par des puits privés ou petits réseaux, aînés…). Pourquoi ?
			9. S'il y a lieu, quelles sont les mesures d'adaptation qui ont été prises en lien avec ces conséquences ?
			Conséquences sur les écosystèmes pour l'épisode de de l'année
			10. Est-ce que cet épisode de manque d'eau sévère a eu des conséquences sur les écosystèmes
						Passer à la question à la section suivante
			11.Quelles ont été les conséquences de cet épisode de manque d'eau sévère sur les écosystèmes ?
			Conséquences de cet épisode de manque d'eau sévère sur les écosystèmes	Oui/Non/NSP
			Propagation d’espèces exotiques envahissantes (EEE)
			Baisse de diversité (végétaux indigènes)
			Baisse de population des poissons d’eau douce
			Réduction des populations d’oiseaux
			Circulation limitée des espèces aquatiques
			Dégradation des milieux humides
			Contaminations microbiologiques
			Eutrophisation / présence de cyanobactérie
			Érosion des berges et des rives
			Pollution accentuée des cours d'eau
			Épisode de mortalité importante de poissons
			Contamination chimique
			Autre			Spécifiez:
			Autre			Spécifiez:
			Autre			Spécifiez:
		1
		2	12.Pour chacune des conséquences identifiées, pouvez-vous évaluer sa sévérité sur une échelle de 1-4 (De 1 -Peu sévère à 4 -Très sévère)
		3	Conséquences de cet épisode de manque d'eau sévère sur les écosystèmes	Sévérité de la conséquence		Pouvez-vous nous donner une description de ces conséquences ?
		1
		2
		3
		4
		5
		6
		7
		8
		9
		10
		11
		12
		13
		14
		15
			13. S'il y a lieu, quelles sont les mesures d'adaptation qui ont été prises en lien avec ces conséquences ?
			Autres commentaires généraux sur l'épisode de de l'année
			14. Avez-vous d'autres commentaires à soulever sur cet épisode?
		15. Il est possible que nous souhaiterions approfondir les connaissances sur les conséquences de cet épisode de manque d'eau sévère dans la phase 2 du projet CASCADES (2023-2024). Dans cette éventualité, quels sont les intervenants avec qui nous devrions prendre contact ? (Organismes, municipalités, personnes-ressources, etc.) Si vous avez les coordonnées d'organisations et/ou d'individus avec qu…
			Contact 1
			Organisation :
			Prénom et Nom :
			Rôle : :
			Courriel :
			No de tel :
			Contact 2
			Organisation :
			Prénom et Nom :
			Rôle : :
			Courriel :
			No de tel :
			Contact 3
			Organisation :
			Prénom et Nom :
			Rôle : :
			Courriel :
			No de tel :

## Sheet: Pilote
Avant 1995							Rang A	Rang B	Rang C				réponse A	réponse B	réponse C	Épisode A	Épisode B	Épisode C		Rang A	Rang B	Rang C				réponse A	réponse B	réponse C	Épisode A	Épisode B	Épisode C
1995							Conséquence listes													Conséquences sur les usages anthropiques
1996							#N/A	#N/A	#N/A	Propagation d’espèces exotiques envahissantes (EEE)	Propagation d’espèces exotiques envahissantes (EEE)	Propagation d’espèces exotiques envahissantes (EEE)	0	0	0	FALSE	FALSE	FALSE		#N/A	#N/A	#N/A	Problèmes d'approvisionnement en eau potable	Problèmes d'approvisionnement en eau potable	Problèmes d'approvisionnement en eau potable	0	0	0	FALSE	FALSE	FALSE
1997							#N/A	#N/A	#N/A	Baisse de diversité (végétaux indigènes)	Baisse de diversité (végétaux indigènes)	Baisse de diversité (végétaux indigènes)	0	0	0	FALSE	FALSE	FALSE		#N/A	#N/A	#N/A	Conflits d'usage entre différents utilisateurs*	Conflits d'usage entre différents utilisateurs*	Conflits d'usage entre différents utilisateurs*	0	0	0	FALSE	FALSE	FALSE
1998							#N/A	#N/A	#N/A	Baisse de population des poissons d’eau douce	Baisse de population des poissons d’eau douce	Baisse de population des poissons d’eau douce	0	0	0	FALSE	FALSE	FALSE		#N/A	#N/A	#N/A	Pertes de récoltes agricoles	Pertes de récoltes agricoles	Pertes de récoltes agricoles	0	0	0	FALSE	FALSE	FALSE
1999							#N/A	#N/A	#N/A	Réduction des populations d’oiseaux	Réduction des populations d’oiseaux	Réduction des populations d’oiseaux	0	0	0	FALSE	FALSE	FALSE		#N/A	#N/A	#N/A	Restrictions d'usage (ex. :reliées à l'industrie récréo-touristique, navigation commerciale)	Restrictions d'usage (ex. :reliées à l'industrie récréo-touristique, navigation commerciale)	Restrictions d'usage (ex. :reliées à l'industrie récréo-touristique, navigation commerciale)	0	0	0	FALSE	FALSE	FALSE
2000							#N/A	#N/A	#N/A	Circulation limitée des espèces aquatiques	Circulation limitée des espèces aquatiques	Circulation limitée des espèces aquatiques	0	0	0	FALSE	FALSE	FALSE		#N/A	#N/A	#N/A	Pertes économiques pour l'activité industrielle	Pertes économiques pour l'activité industrielle	Pertes économiques pour l'activité industrielle	0	0	0	FALSE	FALSE	FALSE
2001							#N/A	#N/A	#N/A	Dégradation des milieux humides	Dégradation des milieux humides	Dégradation des milieux humides	0	0	0	FALSE	FALSE	FALSE		#N/A	#N/A	#N/A	Pertes économiques pour l'activité fluviale	Pertes économiques pour l'activité fluviale	Pertes économiques pour l'activité fluviale	0	0	0	FALSE	FALSE	FALSE
2002							#N/A	#N/A	#N/A	Contaminations microbiologiques	Contaminations microbiologiques	Contaminations microbiologiques	0	0	0	FALSE	FALSE	FALSE		#N/A	#N/A	#N/A	Altération de la qualité de l'eau potable (odeur, couleur, goût, etc.)	Altération de la qualité de l'eau potable (odeur, couleur, goût, etc.)	Altération de la qualité de l'eau potable (odeur, couleur, goût, etc.)	0	0	0	FALSE	FALSE	FALSE
2003							#N/A	#N/A	#N/A	Eutrophisation / présence de cyanobactérie	Eutrophisation / présence de cyanobactérie	Eutrophisation / présence de cyanobactérie	0	0	0	FALSE	FALSE	FALSE		#N/A	#N/A	#N/A	Augmentation du risque sanitaire pour la consommation humaine (contamination microbiologique ou chimique)	Augmentation du risque sanitaire pour la consommation humaine (contamination microbiologique ou chimique)	Augmentation du risque sanitaire pour la consommation humaine (contamination microbiologique ou chimique)	0	0	0	FALSE	FALSE	FALSE
2004							#N/A	#N/A	#N/A	Érosion des berges et des rives	Érosion des berges et des rives	Érosion des berges et des rives	0	0	0	FALSE	FALSE	FALSE		#N/A	#N/A	#N/A	Augmentation des coûts de traitement reliés aux sources d'eau potable (baisse du facteur de dilution)	Augmentation des coûts de traitement reliés aux sources d'eau potable (baisse du facteur de dilution)	Augmentation des coûts de traitement reliés aux sources d'eau potable (baisse du facteur de dilution)	0	0	0	FALSE	FALSE	FALSE
2005							#N/A	#N/A	#N/A	Pollution accentuée des cours d'eau	Pollution accentuée des cours d'eau	Pollution accentuée des cours d'eau	0	0	0	FALSE	FALSE	FALSE		#N/A	#N/A	#N/A	Augmentation des risques d'incendies / incapacité à les combattre	Augmentation des risques d'incendies / incapacité à les combattre	Augmentation des risques d'incendies / incapacité à les combattre	0	0	0	FALSE	FALSE	FALSE
2006							#N/A	#N/A	#N/A	Épisode de mortalité importante de poissons	Épisode de mortalité importante de poissons	Épisode de mortalité importante de poissons	0	0	0	FALSE	FALSE	FALSE		#N/A	#N/A	#N/A	Pertes de production hydroélectrique	Pertes de production hydroélectrique	Pertes de production hydroélectrique	0	0	0	FALSE	FALSE	FALSE
2007							#N/A	#N/A	#N/A	Contamination chimique	Contamination chimique	Contamination chimique	0	0	0	FALSE	FALSE	FALSE		#N/A	#N/A	#N/A	Dommages aux infrastructures (ex. : lié à l'érosion ou à l'affaissement de la nappe phréatique)	Dommages aux infrastructures (ex. : lié à l'érosion ou à l'affaissement de la nappe phréatique)	Dommages aux infrastructures (ex. : lié à l'érosion ou à l'affaissement de la nappe phréatique)	0	0	0	FALSE	FALSE	FALSE
2008							#N/A	#N/A	#N/A	Autre:	Autre:	Autre:	0	0	0	FALSE	FALSE	FALSE		#N/A	#N/A	#N/A	Autre:	Autre:	Autre:	0	0	0	FALSE	FALSE	FALSE
2009							#N/A	#N/A	#N/A	Autre:	Autre:	Autre:	0	0	0	FALSE	FALSE	FALSE		#N/A	#N/A	#N/A	Autre:	Autre:	Autre:	0	0	0	FALSE	FALSE	FALSE
2010							#N/A	#N/A	#N/A	Autre:	Autre:	Autre:	0	0	0	FALSE	FALSE	FALSE		#N/A	#N/A	#N/A	Autre:	Autre:	Autre:	0	0	0	FALSE	FALSE	FALSE
2011
2012
2013
2014
2015
2016
2017
2018
2019
2020
2021
2022
0- Aucune conséquence/Ne sait pas	0
1- Très peu sévère	1
2- Peu sévère	2
3- Sévère	3
4- Très sévère	4
Oui
Non
Ne sait pas
1- Très peu sévère
2- Peu sévère
3- Sévère
4- Très sévère
Ne sait pas
Janvier
Février
Mars
Avril
Mai
Juin
Juillet
Août
Septembre
Octobre
Novembre
Décembre
Ne sait pas
																Usages hors cours d'eau/plan d'eau			Usages dans l'eau
																• Résidentiel ou domestique			• Usages récréatifs
																• Producteurs agricoles			• Écosystème aquatique
																• Récréotourisme hors de l'eau (golf, etc.)			• Centrale hydroélectrique
																• Industries, commerces et institutions			• Transport maritime

## Sheet: Merge
Question	Épisode	Variable	Réponse
Intro	Information répondants	Nom du répondant:	0
Intro	Information répondants	No. de tel:	0
Intro	Information répondants	Adresse courriel:	0
Intro	Information répondants	Rôle:	0
Intro	Information répondants	Organisation (OBV, Comité ZIP):	0
Identification	Épisode 1	Nom de l'épisode	0
Identification	Épisode 2	Nom de l'épisode	0
Identification	Épisode 3	Nom de l'épisode	0
Identification	Épisode 4	Nom de l'épisode	0
Identification	Épisode 5	Nom de l'épisode	0
Identification	Épisode 6	Nom de l'épisode	0
Identification	Épisode 7	Nom de l'épisode	0
Identification	Épisode 8	Nom de l'épisode	0
Identification	Épisode 9	Nom de l'épisode	0
Identification	Épisode 10	Nom de l'épisode	0
Identification	Épisode 1	Année de début de l'épisode	0
Identification	Épisode 2	Année de début de l'épisode	0
Identification	Épisode 3	Année de début de l'épisode	0
Identification	Épisode 4	Année de début de l'épisode	0
Identification	Épisode 5	Année de début de l'épisode	0
Identification	Épisode 6	Année de début de l'épisode	0
Identification	Épisode 7	Année de début de l'épisode	0
Identification	Épisode 8	Année de début de l'épisode	0
Identification	Épisode 9	Année de début de l'épisode	0
Identification	Épisode 10	Année de début de l'épisode	0
Identification	Épisode 1	Mois de début de l'épisode	0
Identification	Épisode 2	Mois de début de l'épisode	0
Identification	Épisode 3	Mois de début de l'épisode	0
Identification	Épisode 4	Mois de début de l'épisode	0
Identification	Épisode 5	Mois de début de l'épisode	0
Identification	Épisode 6	Mois de début de l'épisode	0
Identification	Épisode 7	Mois de début de l'épisode	0
Identification	Épisode 8	Mois de début de l'épisode	0
Identification	Épisode 9	Mois de début de l'épisode	0
Identification	Épisode 10	Mois de début de l'épisode	0
Identification	Épisode 1	Mois de fin de l'épisode	0
Identification	Épisode 2	Mois de fin de l'épisode	0
Identification	Épisode 3	Mois de fin de l'épisode	0
Identification	Épisode 4	Mois de fin de l'épisode	0
Identification	Épisode 5	Mois de fin de l'épisode	0
Identification	Épisode 6	Mois de fin de l'épisode	0
Identification	Épisode 7	Mois de fin de l'épisode	0
Identification	Épisode 8	Mois de fin de l'épisode	0
Identification	Épisode 9	Mois de fin de l'épisode	0
Identification	Épisode 10	Mois de fin de l'épisode	0
Identification	Épisode 1	Surface	0
Identification	Épisode 2	Surface	0
Identification	Épisode 3	Surface	0
Identification	Épisode 4	Surface	0
Identification	Épisode 5	Surface	0
Identification	Épisode 6	Surface	0
Identification	Épisode 7	Surface	0
Identification	Épisode 8	Surface	0
Identification	Épisode 9	Surface	0
Identification	Épisode 10	Surface	0
Identification	Épisode 1	Souterraine	0
Identification	Épisode 2	Souterraine	0
Identification	Épisode 3	Souterraine	0
Identification	Épisode 4	Souterraine	0
Identification	Épisode 5	Souterraine	0
Identification	Épisode 6	Souterraine	0
Identification	Épisode 7	Souterraine	0
Identification	Épisode 8	Souterraine	0
Identification	Épisode 9	Souterraine	0
Identification	Épisode 10	Souterraine	0
Identification	Épisode 1	Des conséquences sur les usages anthropiques/bien-être des populations ont-elles été identifiées/documentées	0
Identification	Épisode 2	Des conséquences sur les usages anthropiques/bien-être des populations ont-elles été identifiées/documentées	0
Identification	Épisode 3	Des conséquences sur les usages anthropiques/bien-être des populations ont-elles été identifiées/documentées	0
Identification	Épisode 4	Des conséquences sur les usages anthropiques/bien-être des populations ont-elles été identifiées/documentées	0
Identification	Épisode 5	Des conséquences sur les usages anthropiques/bien-être des populations ont-elles été identifiées/documentées	0
Identification	Épisode 6	Des conséquences sur les usages anthropiques/bien-être des populations ont-elles été identifiées/documentées	0
Identification	Épisode 7	Des conséquences sur les usages anthropiques/bien-être des populations ont-elles été identifiées/documentées	0
Identification	Épisode 8	Des conséquences sur les usages anthropiques/bien-être des populations ont-elles été identifiées/documentées	0
Identification	Épisode 9	Des conséquences sur les usages anthropiques/bien-être des populations ont-elles été identifiées/documentées	0
Identification	Épisode 10	Des conséquences sur les usages anthropiques/bien-être des populations ont-elles été identifiées/documentées	0
Identification	Épisode 1	Comment évalueriez-vous leur sévérité globale ? De 0 (Aucune conséquence/Ne sait pas) à 4 (Très sévère)	0
Identification	Épisode 2	Comment évalueriez-vous leur sévérité globale ? De 0 (Aucune conséquence/Ne sait pas) à 4 (Très sévère)	0
Identification	Épisode 3	Comment évalueriez-vous leur sévérité globale ? De 0 (Aucune conséquence/Ne sait pas) à 4 (Très sévère)	0
Identification	Épisode 4	Comment évalueriez-vous leur sévérité globale ? De 0 (Aucune conséquence/Ne sait pas) à 4 (Très sévère)	0
Identification	Épisode 5	Comment évalueriez-vous leur sévérité globale ? De 0 (Aucune conséquence/Ne sait pas) à 4 (Très sévère)	0
Identification	Épisode 6	Comment évalueriez-vous leur sévérité globale ? De 0 (Aucune conséquence/Ne sait pas) à 4 (Très sévère)	0
Identification	Épisode 7	Comment évalueriez-vous leur sévérité globale ? De 0 (Aucune conséquence/Ne sait pas) à 4 (Très sévère)	0
Identification	Épisode 8	Comment évalueriez-vous leur sévérité globale ? De 0 (Aucune conséquence/Ne sait pas) à 4 (Très sévère)	0
Identification	Épisode 9	Comment évalueriez-vous leur sévérité globale ? De 0 (Aucune conséquence/Ne sait pas) à 4 (Très sévère)	0
Identification	Épisode 10	Comment évalueriez-vous leur sévérité globale ? De 0 (Aucune conséquence/Ne sait pas) à 4 (Très sévère)	0
Identification	Épisode 1	Des conséquences sur la santé des écosystèmes ont-elles été identifiées/documentées?	0
Identification	Épisode 2	Des conséquences sur la santé des écosystèmes ont-elles été identifiées/documentées?	0
Identification	Épisode 3	Des conséquences sur la santé des écosystèmes ont-elles été identifiées/documentées?	0
Identification	Épisode 4	Des conséquences sur la santé des écosystèmes ont-elles été identifiées/documentées?	0
Identification	Épisode 5	Des conséquences sur la santé des écosystèmes ont-elles été identifiées/documentées?	0
Identification	Épisode 6	Des conséquences sur la santé des écosystèmes ont-elles été identifiées/documentées?	0
Identification	Épisode 7	Des conséquences sur la santé des écosystèmes ont-elles été identifiées/documentées?	0
Identification	Épisode 8	Des conséquences sur la santé des écosystèmes ont-elles été identifiées/documentées?	0
Identification	Épisode 9	Des conséquences sur la santé des écosystèmes ont-elles été identifiées/documentées?	0
Identification	Épisode 10	Des conséquences sur la santé des écosystèmes ont-elles été identifiées/documentées?	0
Identification	Épisode 1	Comment évalueriez-vous leur sévérité globale ? De 0 (Aucune conséquence/Ne sait pas) à 4 (Très sévère)	0
Identification	Épisode 2	Comment évalueriez-vous leur sévérité globale ? De 0 (Aucune conséquence/Ne sait pas) à 4 (Très sévère)	0
Identification	Épisode 3	Comment évalueriez-vous leur sévérité globale ? De 0 (Aucune conséquence/Ne sait pas) à 4 (Très sévère)	0
Identification	Épisode 4	Comment évalueriez-vous leur sévérité globale ? De 0 (Aucune conséquence/Ne sait pas) à 4 (Très sévère)	0
Identification	Épisode 5	Comment évalueriez-vous leur sévérité globale ? De 0 (Aucune conséquence/Ne sait pas) à 4 (Très sévère)	0
Identification	Épisode 6	Comment évalueriez-vous leur sévérité globale ? De 0 (Aucune conséquence/Ne sait pas) à 4 (Très sévère)	0
Identification	Épisode 7	Comment évalueriez-vous leur sévérité globale ? De 0 (Aucune conséquence/Ne sait pas) à 4 (Très sévère)	0
Identification	Épisode 8	Comment évalueriez-vous leur sévérité globale ? De 0 (Aucune conséquence/Ne sait pas) à 4 (Très sévère)	0
Identification	Épisode 9	Comment évalueriez-vous leur sévérité globale ? De 0 (Aucune conséquence/Ne sait pas) à 4 (Très sévère)	0
Identification	Épisode 10	Comment évalueriez-vous leur sévérité globale ? De 0 (Aucune conséquence/Ne sait pas) à 4 (Très sévère)	0
1	a	1. Pouvez-vous fournir une courte description de cet épisode ?	0
2	a	2. Quel(s) lac(s), milieu(x) humide(s), rivière(s) ou source d’eau souterraine ont été touché(s)?	0
3	a	3. Quelle(s) entité(s) administrative(s) de votre territoire a/ont été touchée(s) ? Écrire le nom de la ou des MRC, municipalité(s)	0
4	a	Étiage sévère	0
4	a	Bas niveau de la nappe phréatique.	0
4	a	Surconsommation d'eau	0
4	a	Période prolongée de sécheresse (> 1 saison)	0
4	a	Période chaude et sèche de plus courte durée (<1 saison)	0
4	a	Faible quantité de neige	0
4	a	Arrivée hâtive du printemps	0
4	a	Déficit pluviométrique	0
4	a	Enjeux géomorphologiques liés à l'écoulement de la rivière (ex. : modification du tracé de la rivière en raison de l'étiage)	0
4	a	Gestion inadaptée des variations de niveaux d’eau	0
4	a	Réseau de distribution d'eau vétust	0
4	a	Développement immobilier / étalement urbain/ réseaux routiers ?	0
4	a	Autre	0
4	a	Autre	0
4	a	Autre	0
4 (spécifiez)	a	Surconsommation d'eau (spé)	0
4 (spécifiez)	a	Autre (spé)	0
4 (spécifiez)	a	Autre (spé)	0
4 (spécifiez)	a	Autre (spé)	0
5 (surface)	a	Débit dans le cours d’eau	0
5 (surface)	a	Niveau d’eau dans les puits	0
5 (surface)	a	Niveau dans le lac ou le milieu humide	0
5 (surface)	a	Qualité chimique ou biologique de l’eau	0
5 (surface)	a	Qualité visuelle de l’eau	0
5 (surface)	a	Température de l’eau	0
5 (surface)	a	Autres (spécifier)	0
5 (Souterraine)	a	Débit dans le cours d’eau	0
5 (Souterraine)	a	Niveau d’eau dans les puits	0
5 (Souterraine)	a	Niveau dans le lac ou le milieu humide	0
5 (Souterraine)	a	Qualité chimique ou biologique de l’eau	0
5 (Souterraine)	a	Qualité visuelle de l’eau	0
5 (Souterraine)	a	Température de l’eau	0
5 (Souterraine)	a	Autres (spécifier)	0
5 (Spécifiez)	a	Débit dans le cours d’eau	0
5 (Spécifiez)	a	Niveau d’eau dans les puits	0
5 (Spécifiez)	a	Niveau dans le lac ou le milieu humide	0
5 (Spécifiez)	a	Qualité chimique ou biologique de l’eau	0
5 (Spécifiez)	a	Qualité visuelle de l’eau	0
5 (Spécifiez)	a	Température de l’eau	0
5 (Spécifiez)	a	Autres (spécifier)	0
6	a	6. Est-ce que cet épisode de manque d'eau a eu des conséquences sur les usages anthropiques et le bien-être des populations ? (ex. : conflits d’usage entre différents utilisateurs)	0
7	a	Problèmes d'approvisionnement en eau potable	0
7	a	Conflits d'usage entre différents utilisateurs*	0
7	a	Pertes de récoltes agricoles	0
7	a	Restrictions d'usage (ex. :reliées à l'industrie récréo-touristique, navigation commerciale)	0
7	a	Pertes économiques pour l'activité industrielle	0
7	a	Pertes économiques pour l'activité fluviale	0
7	a	Altération de la qualité de l'eau potable (odeur, couleur, goût, etc.)	0
7	a	Augmentation du risque sanitaire pour la consommation humaine (contamination microbiologique ou chimique)	0
7	a	Augmentation des coûts de traitement reliés aux sources d'eau potable (baisse du facteur de dilution)	0
7	a	Augmentation des risques d'incendies / incapacité à les combattre	0
7	a	Pertes de production hydroélectrique	0
7	a	Dommages aux infrastructures (ex. : lié à l'érosion ou à l'affaissement de la nappe phréatique)	0
7	a	Autre	0
7	a	Autre	0
7	a	Autre	0
7 (spé)	a	Précisez les usages/utilisateurs concernés*:	0
7 (spé)	a	Autre (spé)	0
7 (spé)	a	Autre (spé)	0
7 (spé)	a	Autre (spé)	0
8 (identification)	a	Identification 1
8 (identification)	a	Identification 2
8 (identification)	a	Identification 3
8 (identification)	a	Identification 4
8 (identification)	a	Identification 5
8 (identification)	a	Identification 6
8 (identification)	a	Identification 7
8 (identification)	a	Identification 8
8 (identification)	a	Identification 9
8 (identification)	a	Identification 10
8 (identification)	a	Identification 11
8 (identification)	a	Identification 12
8 (identification)	a	Identification 13
8 (identification)	a	Identification 14
8 (identification)	a	Identification 15
8 (Sévérité)	a	Sévérité 1	0
8 (Sévérité)	a	Sévérité 2	0
8 (Sévérité)	a	Sévérité 3	0
8 (Sévérité)	a	Sévérité 4	0
8 (Sévérité)	a	Sévérité 5	0
8 (Sévérité)	a	Sévérité 6	0
8 (Sévérité)	a	Sévérité 7	0
8 (Sévérité)	a	Sévérité 8	0
8 (Sévérité)	a	Sévérité 9	0
8 (Sévérité)	a	Sévérité 10	0
8 (Sévérité)	a	Sévérité 11	0
8 (Sévérité)	a	Sévérité 12	0
8 (Sévérité)	a	Sévérité 13	0
8 (Sévérité)	a	Sévérité 14	0
8(Sévérité)	a	Sévérité 15	0
8 (des)	a	Description 1	0
8 (des)	a	Description 2	0
8 (des)	a	Description 3	0
8 (des)	a	Description 4	0
8 (des)	a	Description 5	0
8 (des)	a	Description 6	0
8 (des)	a	Description 7	0
8 (des)	a	Description 8	0
8 (des)	a	Description 9	0
8 (des)	a	Description 10	0
8 (des)	a	Description 11	0
8 (des)	a	Description 12	0
8 (des)	a	Description 13	0
8 (des)	a	Description 14	0
8 (des)	a	Description 15	0
9	a	9. S'il y a lieu, quelles sont les mesures d'adaptation qui ont été prises en lien avec ces conséquences ?	0
10	a	10. Est-ce que cet épisode a eu des conséquences sur les écosystèmes ?	0
11	a	Propagation d’espèces exotiques envahissantes (EEE)	0
11	a	Baisse de diversité (végétaux indigènes)	0
11	a	Baisse de population des poissons d’eau douce	0
11	a	Réduction des populations d’oiseaux	0
11	a	Circulation limitée des espèces aquatiques	0
11	a	Dégradation des milieux humides	0
11	a	Contaminations microbiologiques	0
11	a	Eutrophisation / présence de cyanobactérie	0
11	a	Érosion des berges et des rives	0
11	a	Pollution accentuée des cours d'eau	0
11	a	Épisode de mortalité importante de poissons	0
11	a	Contamination chimique	0
11	a	Autre	0
11	a	Autre	0
11	a	Autre	0
11	a	Autre (spé)	0
11	a	Autre (spé)	0
11	a	Autre (spé)	0
12 (identification)	a	Identification 1
12 (identification)	a	Identification 2
12 (identification)	a	Identification 3
12 (identification)	a	Identification 4
12 (identification)	a	Identification 5
12 (identification)	a	Identification 6
12 (identification)	a	Identification 7
12 (identification)	a	Identification 8
12 (identification)	a	Identification 9
12 (identification)	a	Identification 10
12 (identification)	a	Identification 11
12 (identification)	a	Identification 12
12 (identification)	a	Identification 13
12 (identification)	a	Identification 14
12 (identification)	a	Identification 15
12 (sévérité)	a	Sévérité 1	0
12 (sévérité)	a	Sévérité 2	0
12 (sévérité)	a	Sévérité 3	0
12 (sévérité)	a	Sévérité 4	0
12 (sévérité)	a	Sévérité 5	0
12 (sévérité)	a	Sévérité 6	0
12 (sévérité)	a	Sévérité 7	0
12 (sévérité)	a	Sévérité 8	0
12 (sévérité)	a	Sévérité 9	0
12 (sévérité)	a	Sévérité 10	0
12 (sévérité)	a	Sévérité 11	0
12 (sévérité)	a	Sévérité 12	0
12 (sévérité)	a	Sévérité 13	0
12 (sévérité)	a	Sévérité 14	0
12 (sévérité)	a	Sévérité 15	0
12 (Description)	a	Description 1	0
12 (Description)	a	Description 2	0
12 (Description)	a	Description 3	0
12 (Description)	a	Description 4	0
12 (Description)	a	Description 5	0
12 (Description)	a	Description 6	0
12 (Description)	a	Description 7	0
12 (Description)	a	Description 8	0
12 (Description)	a	Description 9	0
12 (Description)	a	Description 10	0
12 (Description)	a	Description 11	0
12 (Description)	a	Description 12	0
12 (Description)	a	Description 13	0
12 (Description)	a	Description 14	0
12 (Description)	a	Description 15	0
13	a	13. S'il y a lieu, quelles sont les mesures d'adaptation qui ont été prises en lien avec ces conséquences ?	0
14	a	14. Avez-vous d'autres commentaires à soulever sur cet épisode?	0
15 (contact 1)	a	Organisation :	0
15 (contact 1)	a	Prénom et Nom :	0
15 (contact 1)	a	Rôle : :	0
15 (contact 1)	a	Courriel :	0
15 (contact 1)	a	No de tel :	0
15 (contact 2)	a	Organisation :	0
15 (contact 2)	a	Prénom et Nom :	0
15 (contact 2)	a	Rôle : :	0
15 (contact 2)	a	Courriel :	0
15 (contact 2)	a	No de tel :	0
15 (contact 3)	a	Organisation :	0
15 (contact 3)	a	Prénom et Nom :	0
15 (contact 3)	a	Rôle : :	0
15 (contact 3)	a	Courriel :	0
15 (contact 3)	a	No de tel :	0
1	b	1. Pouvez-vous fournir une courte description de cet épisode ?	0
2	b	2. Quel(s) lac(s), milieu(x) humide(s), rivière(s) ou source d’eau souterraine ont été touché(s)?	0
3	b	3. Quelle(s) entité(s) administrative(s) de votre territoire a/ont été touchée(s) ? Écrire le nom de la ou des MRC, municipalité(s)	0
4	b	Étiage sévère	0
4	b	Bas niveau de la nappe phréatique.	0
4	b	Surconsommation d'eau	0
4	b	Période prolongée de sécheresse (> 1 saison)	0
4	b	Période chaude et sèche de plus courte durée (<1 saison)	0
4	b	Faible quantité de neige	0
4	b	Arrivée hâtive du printemps	0
4	b	Déficit pluviométrique	0
4	b	Enjeux géomorphologiques liés à l'écoulement de la rivière (ex. : modification du tracé de la rivière en raison de l'étiage)	0
4	b	Gestion inadaptée des variations de niveaux d’eau	0
4	b	Réseau de distribution d'eau vétust	0
4	b	Développement immobilier / étalement urbain/ réseaux routiers ?	0
4	b	Autre	0
4	b	Autre	0
4	b	Autre	0
4 (spécifiez)	b	Surconsommation d'eau (spé)	0
4 (spécifiez)	b	Autre (spé)	0
4 (spécifiez)	b	Autre (spé)	0
4 (spécifiez)	b	Autre (spé)	0
5 (surface)	b	Débit dans le cours d’eau	0
5 (surface)	b	Niveau d’eau dans les puits	0
5 (surface)	b	Niveau dans le lac ou le milieu humide	0
5 (surface)	b	Qualité chimique ou biologique de l’eau	0
5 (surface)	b	Qualité visuelle de l’eau	0
5 (surface)	b	Température de l’eau	0
5 (surface)	b	Autres (spécifier)	0
5 (Souterraine)	b	Débit dans le cours d’eau	0
5 (Souterraine)	b	Niveau d’eau dans les puits	0
5 (Souterraine)	b	Niveau dans le lac ou le milieu humide	0
5 (Souterraine)	b	Qualité chimique ou biologique de l’eau	0
5 (Souterraine)	b	Qualité visuelle de l’eau	0
5 (Souterraine)	b	Température de l’eau	0
5 (Souterraine)	b	Autres (spécifier)	0
5 (Spécifiez)	b	Débit dans le cours d’eau	0
5 (Spécifiez)	b	Niveau d’eau dans les puits	0
5 (Spécifiez)	b	Niveau dans le lac ou le milieu humide	0
5 (Spécifiez)	b	Qualité chimique ou biologique de l’eau	0
5 (Spécifiez)	b	Qualité visuelle de l’eau	0
5 (Spécifiez)	b	Température de l’eau	0
5 (Spécifiez)	b	Autres (spécifier)	0
6	b	6. Est-ce que cet épisode de manque d'eau a eu des conséquences sur les usages anthropiques et le bien-être des populations ? (ex. : conflits d’usage entre différents utilisateurs)	0
7	b	Problèmes d'approvisionnement en eau potable	0
7	b	Conflits d'usage entre différents utilisateurs*	0
7	b	Pertes de récoltes agricoles	0
7	b	Restrictions d'usage (ex. :reliées à l'industrie récréo-touristique, navigation commerciale)	0
7	b	Pertes économiques pour l'activité industrielle	0
7	b	Pertes économiques pour l'activité fluviale	0
7	b	Altération de la qualité de l'eau potable (odeur, couleur, goût, etc.)	0
7	b	Augmentation du risque sanitaire pour la consommation humaine (contamination microbiologique ou chimique)	0
7	b	Augmentation des coûts de traitement reliés aux sources d'eau potable (baisse du facteur de dilution)	0
7	b	Augmentation des risques d'incendies / incapacité à les combattre	0
7	b	Pertes de production hydroélectrique	0
7	b	Dommages aux infrastructures (ex. : lié à l'érosion ou à l'affaissement de la nappe phréatique)	0
7	b	Autre	0
7	b	Autre	0
7	b	Autre	0
7 (spé)	b	Précisez les usages/utilisateurs concernés*:	0
7 (spé)	b	Autre (spé)	0
7 (spé)	b	Autre (spé)	0
7 (spé)	b	Autre (spé)	0
8 (identification)	b	Identification 1
8 (identification)	b	Identification 2
8 (identification)	b	Identification 3
8 (identification)	b	Identification 4
8 (identification)	b	Identification 5
8 (identification)	b	Identification 6
8 (identification)	b	Identification 7
8 (identification)	b	Identification 8
8 (identification)	b	Identification 9
8 (identification)	b	Identification 10
8 (identification)	b	Identification 11
8 (identification)	b	Identification 12
8 (identification)	b	Identification 13
8 (identification)	b	Identification 14
8 (identification)	b	Identification 15
8 (Sévérité)	b	Sévérité 1	0
8 (Sévérité)	b	Sévérité 2	0
8 (Sévérité)	b	Sévérité 3	0
8 (Sévérité)	b	Sévérité 4	0
8 (Sévérité)	b	Sévérité 5	0
8 (Sévérité)	b	Sévérité 6	0
8 (Sévérité)	b	Sévérité 7	0
8 (Sévérité)	b	Sévérité 8	0
8 (Sévérité)	b	Sévérité 9	0
8 (Sévérité)	b	Sévérité 10	0
8 (Sévérité)	b	Sévérité 11	0
8 (Sévérité)	b	Sévérité 12	0
8 (Sévérité)	b	Sévérité 13	0
8 (Sévérité)	b	Sévérité 14	0
8 (Sévérité)	b	Sévérité 15	0
8 (des)	b	Description 1	0
8 (des)	b	Description 2	0
8 (des)	b	Description 3	0
8 (des)	b	Description 4	0
8 (des)	b	Description 5	0
8 (des)	b	Description 6	0
8 (des)	b	Description 7	0
8 (des)	b	Description 8	0
8 (des)	b	Description 9	0
8 (des)	b	Description 10	0
8 (des)	b	Description 11	0
8 (des)	b	Description 12	0
8 (des)	b	Description 13	0
8 (des)	b	Description 14	0
9 (des)	b	Description 15	0
9	b	9. S'il y a lieu, quelles sont les mesures d'adaptation qui ont été prises en lien avec ces conséquences ?	0
10	b	10. Est-ce que cet épisode a eu des conséquences sur les écosystèmes ?	0
11	b	Propagation d’espèces exotiques envahissantes (EEE)	0
11	b	Baisse de diversité (végétaux indigènes)	0
11	b	Baisse de population des poissons d’eau douce	0
11	b	Réduction des populations d’oiseaux	0
11	b	Circulation limitée des espèces aquatiques	0
11	b	Dégradation des milieux humides	0
11	b	Contaminations microbiologiques	0
11	b	Eutrophisation / présence de cyanobactérie	0
11	b	Érosion des berges et des rives	0
11	b	Pollution accentuée des cours d'eau	0
11	b	Épisode de mortalité importante de poissons	0
11	b	Contamination chimique	0
11	b	Autre	0
11	b	Autre	0
11	b	Autre	0
11	b	Autre (spé)	0
11	b	Autre (spé)	0
11	b	Autre (spé)	0
12 (identification)	b	Identification 1
12 (identification)	b	Identification 2
12 (identification)	b	Identification 3
12 (identification)	b	Identification 4
12 (identification)	b	Identification 5
12 (identification)	b	Identification 6
12 (identification)	b	Identification 7
12 (identification)	b	Identification 8
12 (identification)	b	Identification 9
12 (identification)	b	Identification 10
12 (identification)	b	Identification 11
12 (identification)	b	Identification 12
12 (identification)	b	Identification 13
12 (identification)	b	Identification 14
12 (identification)	b	Identification 15
12 (sévérité)	b	Sévérité 1	0
12 (sévérité)	b	Sévérité 2	0
12 (sévérité)	b	Sévérité 3	0
12 (sévérité)	b	Sévérité 4	0
12 (sévérité)	b	Sévérité 5	0
12 (sévérité)	b	Sévérité 6	0
12 (sévérité)	b	Sévérité 7	0
12 (sévérité)	b	Sévérité 8	0
12 (sévérité)	b	Sévérité 9	0
12 (sévérité)	b	Sévérité 10	0
12 (sévérité)	b	Sévérité 11	0
12 (sévérité)	b	Sévérité 12	0
12 (sévérité)	b	Sévérité 13	0
12 (sévérité)	b	Sévérité 14	0
12 (sévérité)	b	Sévérité 15	0
12 (Description)	b	Description 1	0
12 (Description)	b	Description 2	0
12 (Description)	b	Description 3	0
12 (Description)	b	Description 4	0
12 (Description)	b	Description 5	0
12 (Description)	b	Description 6	0
12 (Description)	b	Description 7	0
12 (Description)	b	Description 8	0
12 (Description)	b	Description 9	0
12 (Description)	b	Description 10	0
12 (Description)	b	Description 11	0
12 (Description)	b	Description 12	0
12 (Description)	b	Description 13	0
12 (Description)	b	Description 14	0
12 (Description)	b	Description 15	0
13	b	13. S'il y a lieu, quelles sont les mesures d'adaptation qui ont été prises en lien avec ces conséquences ?	0
14	b	14. Avez-vous d'autres commentaires à soulever sur cet épisode?	0
15 (contact 1)	b	Organisation :	0
15 (contact 1)	b	Prénom et Nom :	0
15 (contact 1)	b	Rôle : :	0
15 (contact 1)	b	Courriel :	0
15 (contact 1)	b	No de tel :	0
15 (contact 2)	b	Organisation :	0
15 (contact 2)	b	Prénom et Nom :	0
15 (contact 2)	b	Rôle : :	0
15 (contact 2)	b	Courriel :	0
15 (contact 2)	b	No de tel :	0
15 (contact 3)	b	Organisation :	0
15 (contact 3)	b	Prénom et Nom :	0
15 (contact 3)	b	Rôle : :	0
15 (contact 3)	b	Courriel :	0
15 (contact 3)	b	No de tel :	0
1	c	1. Pouvez-vous fournir une courte description de cet épisode ?	0
2	c	2. Quel(s) lac(s), milieu(x) humide(s), rivière(s) ou source d’eau souterraine ont été touché(s)?	0
3	c	3. Quelle(s) entité(s) administrative(s) de votre territoire a/ont été touchée(s) ? Écrire le nom de la ou des MRC, municipalité(s)	0
4	c	Étiage sévère	0
4	c	Bas niveau de la nappe phréatique.	0
4	c	Surconsommation d'eau	0
4	c	Période prolongée de sécheresse (> 1 saison)	0
4	c	Période chaude et sèche de plus courte durée (<1 saison)	0
4	c	Faible quantité de neige	0
4	c	Arrivée hâtive du printemps	0
4	c	Déficit pluviométrique	0
4	c	Enjeux géomorphologiques liés à l'écoulement de la rivière (ex. : modification du tracé de la rivière en raison de l'étiage)	0
4	c	Gestion inadaptée des variations de niveaux d’eau	0
4	c	Réseau de distribution d'eau vétust	0
4	c	Développement immobilier / étalement urbain/ réseaux routiers ?	0
4	c	Autre	0
4	c	Autre	0
4	c	Autre	0
4 (spécifiez)	c	Surconsommation d'eau (spé)	0
4 (spécifiez)	c	Autre (spé)	0
4 (spécifiez)	c	Autre (spé)	0
4 (spécifiez)	c	Autre (spé)	0
5 (surface)	c	Débit dans le cours d’eau	0
5 (surface)	c	Niveau d’eau dans les puits	0
5 (surface)	c	Niveau dans le lac ou le milieu humide	0
5 (surface)	c	Qualité chimique ou biologique de l’eau	0
5 (surface)	c	Qualité visuelle de l’eau	0
5 (surface)	c	Température de l’eau	0
5 (surface)	c	Autres (spécifier)	0
5 (Souterraine)	c	Débit dans le cours d’eau	0
5 (Souterraine)	c	Niveau d’eau dans les puits	0
5 (Souterraine)	c	Niveau dans le lac ou le milieu humide	0
5 (Souterraine)	c	Qualité chimique ou biologique de l’eau	0
5 (Souterraine)	c	Qualité visuelle de l’eau	0
5 (Souterraine)	c	Température de l’eau	0
5 (Souterraine)	c	Autres (spécifier)	0
5 (Spécifiez)	c	Débit dans le cours d’eau	0
5 (Spécifiez)	c	Niveau d’eau dans les puits	0
5 (Spécifiez)	c	Niveau dans le lac ou le milieu humide	0
5 (Spécifiez)	c	Qualité chimique ou biologique de l’eau	0
5 (Spécifiez)	c	Qualité visuelle de l’eau	0
5 (Spécifiez)	c	Température de l’eau	0
5 (Spécifiez)	c	Autres (spécifier)	0
6	c	6. Est-ce que cet épisode de manque d'eau a eu des conséquences sur les usages anthropiques et le bien-être des populations ? (ex. : conflits d’usage entre différents utilisateurs)	0
7	c	Problèmes d'approvisionnement en eau potable	0
7	c	Conflits d'usage entre différents utilisateurs*	0
7	c	Pertes de récoltes agricoles	0
7	c	Restrictions d'usage (ex. :reliées à l'industrie récréo-touristique, navigation commerciale)	0
7	c	Pertes économiques pour l'activité industrielle	0
7	c	Pertes économiques pour l'activité fluviale	0
7	c	Altération de la qualité de l'eau potable (odeur, couleur, goût, etc.)	0
7	c	Augmentation du risque sanitaire pour la consommation humaine (contamination microbiologique ou chimique)	0
7	c	Augmentation des coûts de traitement reliés aux sources d'eau potable (baisse du facteur de dilution)	0
7	c	Augmentation des risques d'incendies / incapacité à les combattre	0
7	c	Pertes de production hydroélectrique	0
7	c	Dommages aux infrastructures (ex. : lié à l'érosion ou à l'affaissement de la nappe phréatique)	0
7	c	Autre	0
7	c	Autre	0
7	c	Autre	0
7 (spé)	c	Précisez les usages/utilisateurs concernés*:	0
7 (spé)	c	Autre (spé)	0
7 (spé)	c	Autre (spé)	0
7 (spé)	c	Autre (spé)	0
8 (identification)	c	Identification 1
8 (identification)	c	Identification 2
8 (identification)	c	Identification 3
8 (identification)	c	Identification 4
8 (identification)	c	Identification 5
8 (identification)	c	Identification 6
8 (identification)	c	Identification 7
8 (identification)	c	Identification 8
8 (identification)	c	Identification 9
8 (identification)	c	Identification 10
8 (identification)	c	Identification 11
8 (identification)	c	Identification 12
8 (identification)	c	Identification 13
8 (identification)	c	Identification 14
8 (identification)	c	Identification 15
8 (Sévérité)	c	Sévérité 1	0
8 (Sévérité)	c	Sévérité 2	0
8 (Sévérité)	c	Sévérité 3	0
8 (Sévérité)	c	Sévérité 4	0
8 (Sévérité)	c	Sévérité 5	0
8 (Sévérité)	c	Sévérité 6	0
8 (Sévérité)	c	Sévérité 7	0
8 (Sévérité)	c	Sévérité 8	0
8 (Sévérité)	c	Sévérité 9	0
8 (Sévérité)	c	Sévérité 10	0
8 (Sévérité)	c	Sévérité 11	0
8 (Sévérité)	c	Sévérité 12	0
8 (Sévérité)	c	Sévérité 13	0
8 (Sévérité)	c	Sévérité 14	0
8 (Sévérité)	c	Sévérité 15	0
8 (des)	c	Description 1	0
8 (des)	c	Description 2	0
8 (des)	c	Description 3	0
8 (des)	c	Description 4	0
8 (des)	c	Description 5	0
8 (des)	c	Description 6	0
8 (des)	c	Description 7	0
8 (des)	c	Description 8	0
8 (des)	c	Description 9	0
8 (des)	c	Description 10	0
8 (des)	c	Description 11	0
8 (des)	c	Description 12	0
8 (des)	c	Description 13	0
8 (des)	c	Description 14	0
8 (des)	c	Description 15	0
9	c	9. S'il y a lieu, quelles sont les mesures d'adaptation qui ont été prises en lien avec ces conséquences ?	0
10	c	10. Est-ce que cet épisode a eu des conséquences sur les écosystèmes ?	0
11	c	Propagation d’espèces exotiques envahissantes (EEE)	0
11	c	Baisse de diversité (végétaux indigènes)	0
11	c	Baisse de population des poissons d’eau douce	0
11	c	Réduction des populations d’oiseaux	0
11	c	Circulation limitée des espèces aquatiques	0
11	c	Dégradation des milieux humides	0
11	c	Contaminations microbiologiques	0
11	c	Eutrophisation / présence de cyanobactérie	0
11	c	Érosion des berges et des rives	0
11	c	Pollution accentuée des cours d'eau	0
11	c	Épisode de mortalité importante de poissons	0
11	c	Contamination chimique	0
11	c	Autre	0
11	c	Autre	0
11	c	Autre	0
11	c	Autre (spé)	0
11	c	Autre (spé)	0
11	c	Autre (spé)	0
12 (identification)	c	Identification 1
12 (identification)	c	Identification 2
12 (identification)	c	Identification 3
12 (identification)	c	Identification 4
12 (identification)	c	Identification 5
12 (identification)	c	Identification 6
12 (identification)	c	Identification 7
12 (identification)	c	Identification 8
12 (identification)	c	Identification 9
12 (identification)	c	Identification 10
12 (identification)	c	Identification 11
12 (identification)	c	Identification 12
12 (identification)	c	Identification 13
12 (identification)	c	Identification 14
12 (identification)	c	Identification 15
12 (sévérité)	c	Sévérité 1	0
12 (sévérité)	c	Sévérité 2	0
12 (sévérité)	c	Sévérité 3	0
12 (sévérité)	c	Sévérité 4	0
12 (sévérité)	c	Sévérité 5	0
12 (sévérité)	c	Sévérité 6	0
12 (sévérité)	c	Sévérité 7	0
12 (sévérité)	c	Sévérité 8	0
12 (sévérité)	c	Sévérité 9	0
12 (sévérité)	c	Sévérité 10	0
12 (sévérité)	c	Sévérité 11	0
12 (sévérité)	c	Sévérité 12	0
12 (sévérité)	c	Sévérité 13	0
12 (sévérité)	c	Sévérité 14	0
12 (sévérité)	c	Sévérité 15	0
12 (Description)	c	Description 1	0
12 (Description)	c	Description 2	0
12 (Description)	c	Description 3	0
12 (Description)	c	Description 4	0
12 (Description)	c	Description 5	0
12 (Description)	c	Description 6	0
12 (Description)	c	Description 7	0
12 (Description)	c	Description 8	0
12 (Description)	c	Description 9	0
12 (Description)	c	Description 10	0
12 (Description)	c	Description 11	0
12 (Description)	c	Description 12	0
12 (Description)	c	Description 13	0
12 (Description)	c	Description 14	0
12 (Description)	c	Description 15	0
13	c	13. S'il y a lieu, quelles sont les mesures d'adaptation qui ont été prises en lien avec ces conséquences ?	0
14	c	14. Avez-vous d'autres commentaires à soulever sur cet épisode?	0
15 (contact 1)	c	Organisation :	0
15 (contact 1)	c	Prénom et Nom :	0
15 (contact 1)	c	Rôle : :	0
15 (contact 1)	c	Courriel :	0
15 (contact 1)	c	No de tel :	0
15 (contact 2)	c	Organisation :	0
15 (contact 2)	c	Prénom et Nom :	0
15 (contact 2)	c	Rôle : :	0
15 (contact 2)	c	Courriel :	0
15 (contact 2)	c	No de tel :	0
15 (contact 3)	c	Organisation :	0
15 (contact 3)	c	Prénom et Nom :	0
15 (contact 3)	c	Rôle : :	0
15 (contact 3)	c	Courriel :	0
15 (contact 3)	c	No de tel :	0
7 (spé)	a	Augmentation du risque sanitaire pour la consommation humaine (contamination microbiologique ou chimique)	0
7 (spé)	b	Augmentation du risque sanitaire pour la consommation humaine (contamination microbiologique ou chimique)	0
7 (spé)	c	Augmentation du risque sanitaire pour la consommation humaine (contamination microbiologique ou chimique)	0
8.a	a	8.a. À votre connaissance, quels ont été les usagers de l'eau les plus affectés par ces conséquences ? (ex. : centres urbains, zones rurales, populations desservies par des puits privés ou petits réseaux, aînés…). Pourquoi ?	0
8.a	b	8.a. À votre connaissance, quels ont été les usagers de l'eau les plus affectés par ces conséquences ? (ex. : centres urbains, zones rurales, populations desservies par des puits privés ou petits réseaux, aînés…). Pourquoi ?	0
8.a	c	8.a. À votre connaissance, quels ont été les usagers de l'eau les plus affectés par ces conséquences ? (ex. : centres urbains, zones rurales, populations desservies par des puits privés ou petits réseaux, aînés…). Pourquoi ?	0
