# Supplementary material for: Storyline analytical framework for understanding future severe low-water episodes and their consequences
Source: Copernicus journal article supplement (doi:10.5194/hess-29-4893-2025), 2025-10-01
Supplement: Supplementary file 1 [file hess-29-4893-2025-supplement.zip]

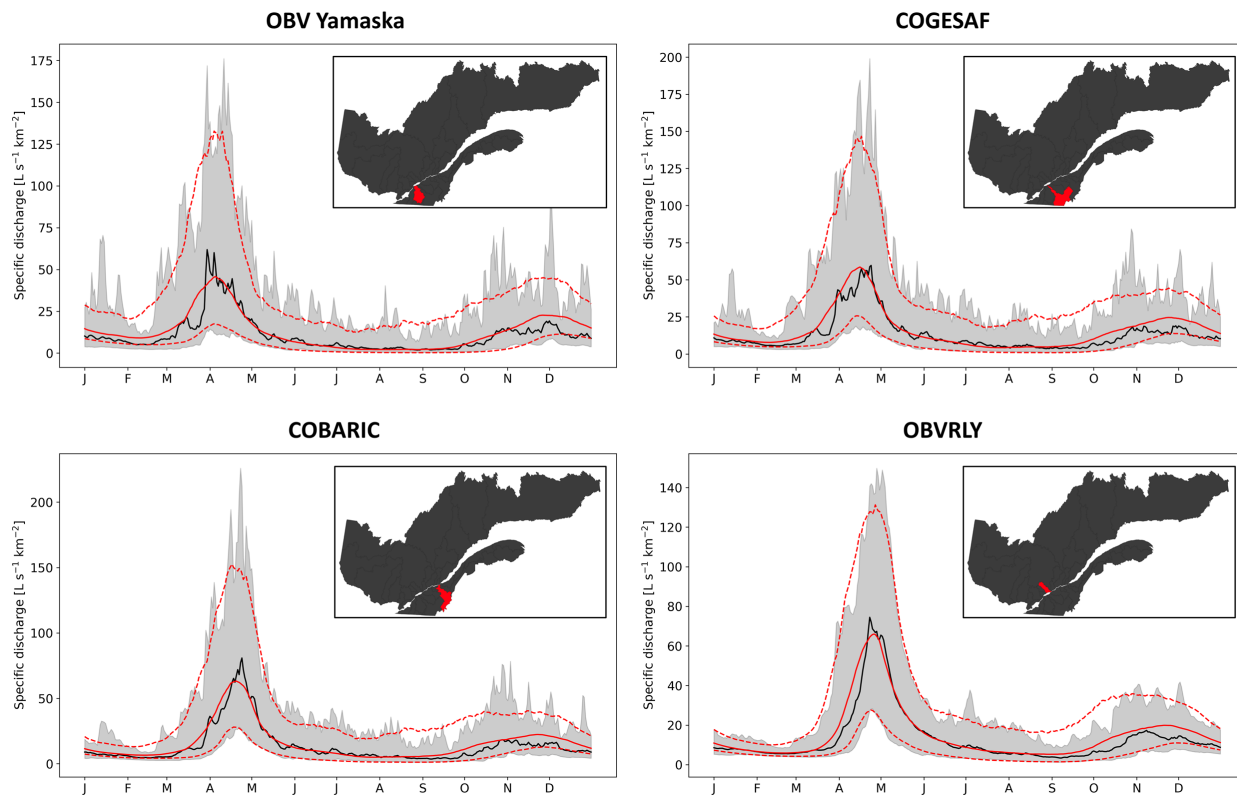

**Figure S1.** Comparison of observed streamflow (grey) and ClimEx-driven streamflow (red) for four watersheds over the historical period. The shaded area and dotted lines indicate the 10<sup>th</sup> and 90<sup>th</sup> percentiles, all river segments and years combined.

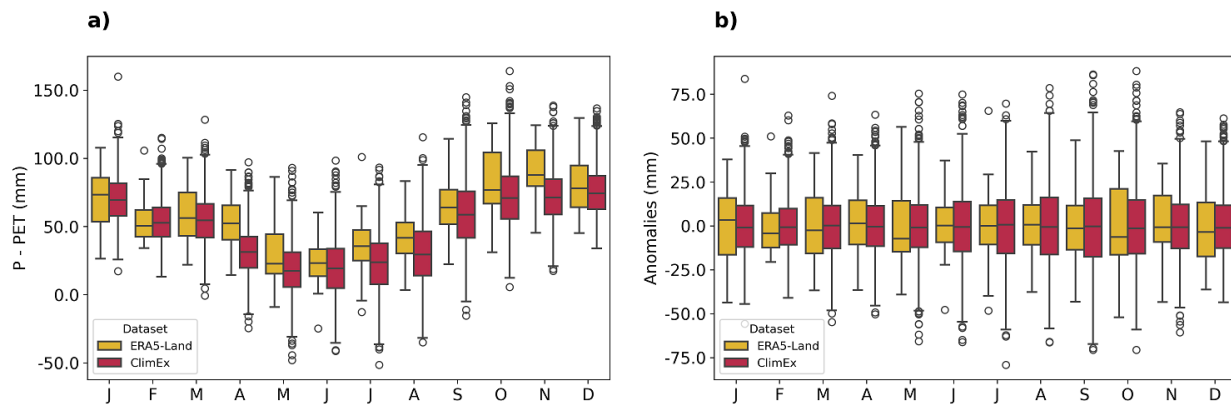

**Figure S2.** Comparison of ERA5-Land and the bias-adjusted ClimEx dataset for the historical period, for a) the water budget  $P - PET$  (mm) and b) the anomalies compared to the 30-year monthly average.

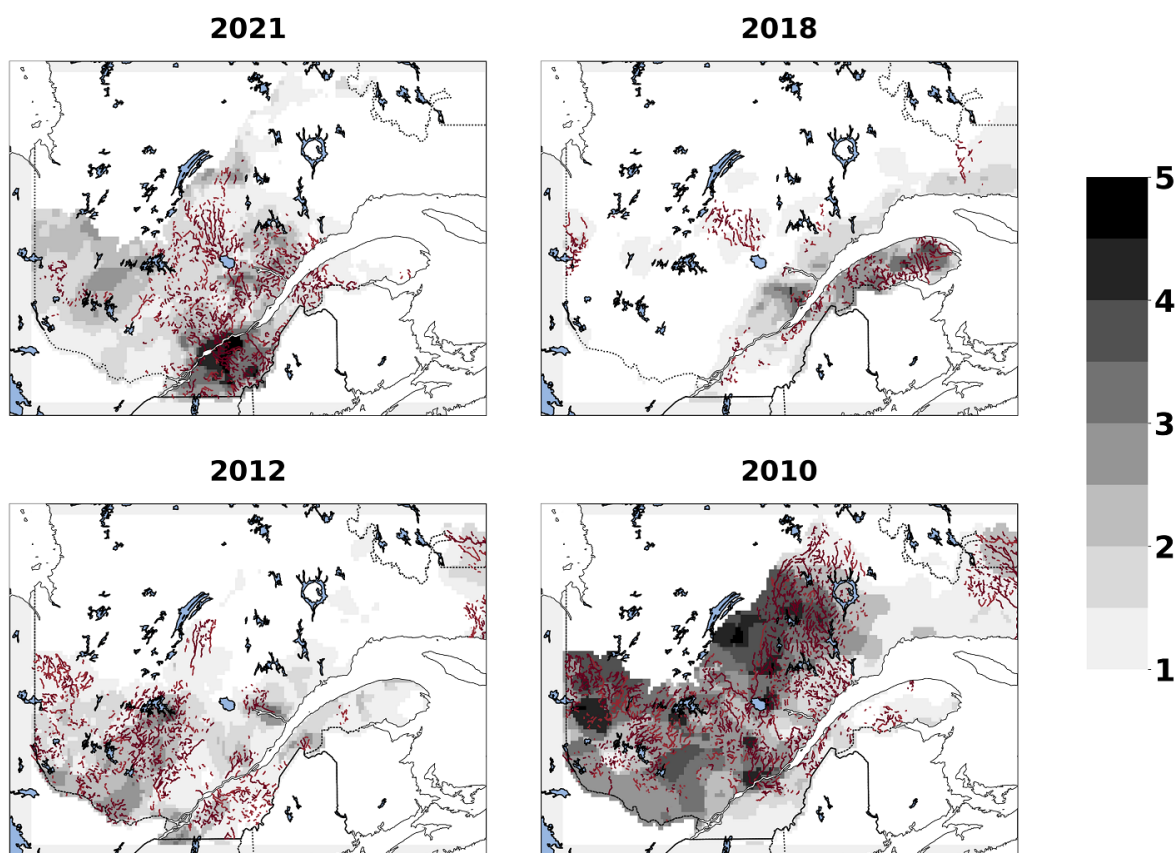

**Figure S3.** Sum of all weights used during the assessment of candidate analogues (Fig. 3) for four years with intense hydrological drought conditions. The river reaches where the  $7Q_{min}$  is within the worst 3 years for the period 1992-2021 are shown in red.

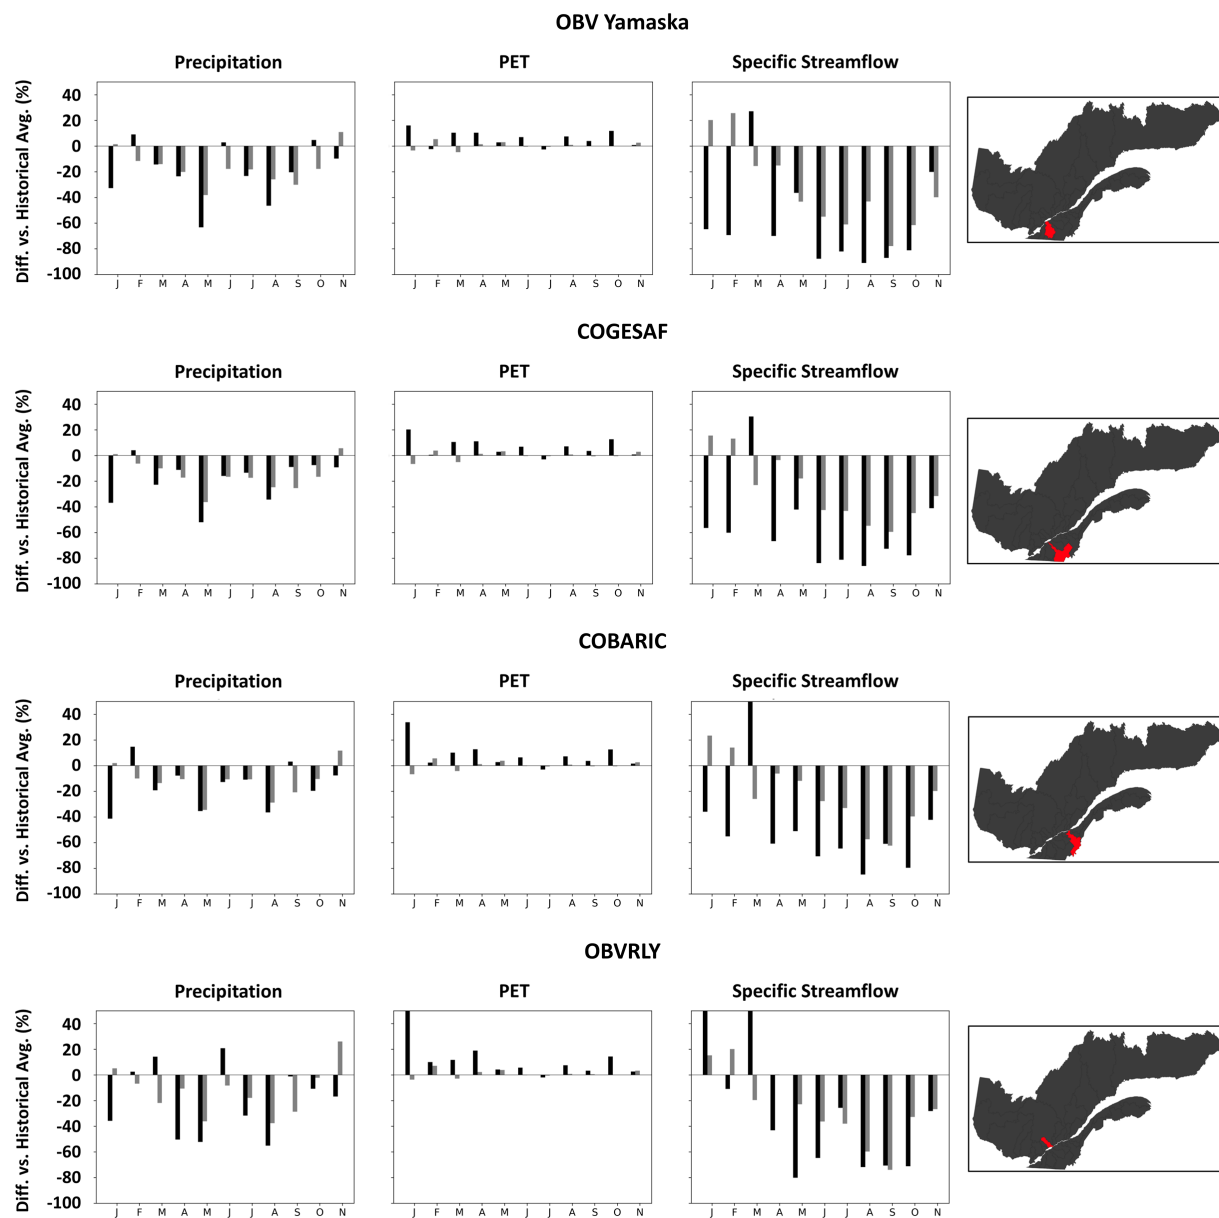

**Figure S4.** Comparison of monthly mean anomalies in precipitation, evapotranspiration and streamflow for the observed 2021 (black) and for the average of the 10 best ClimEx analogues during the historical period (grey).

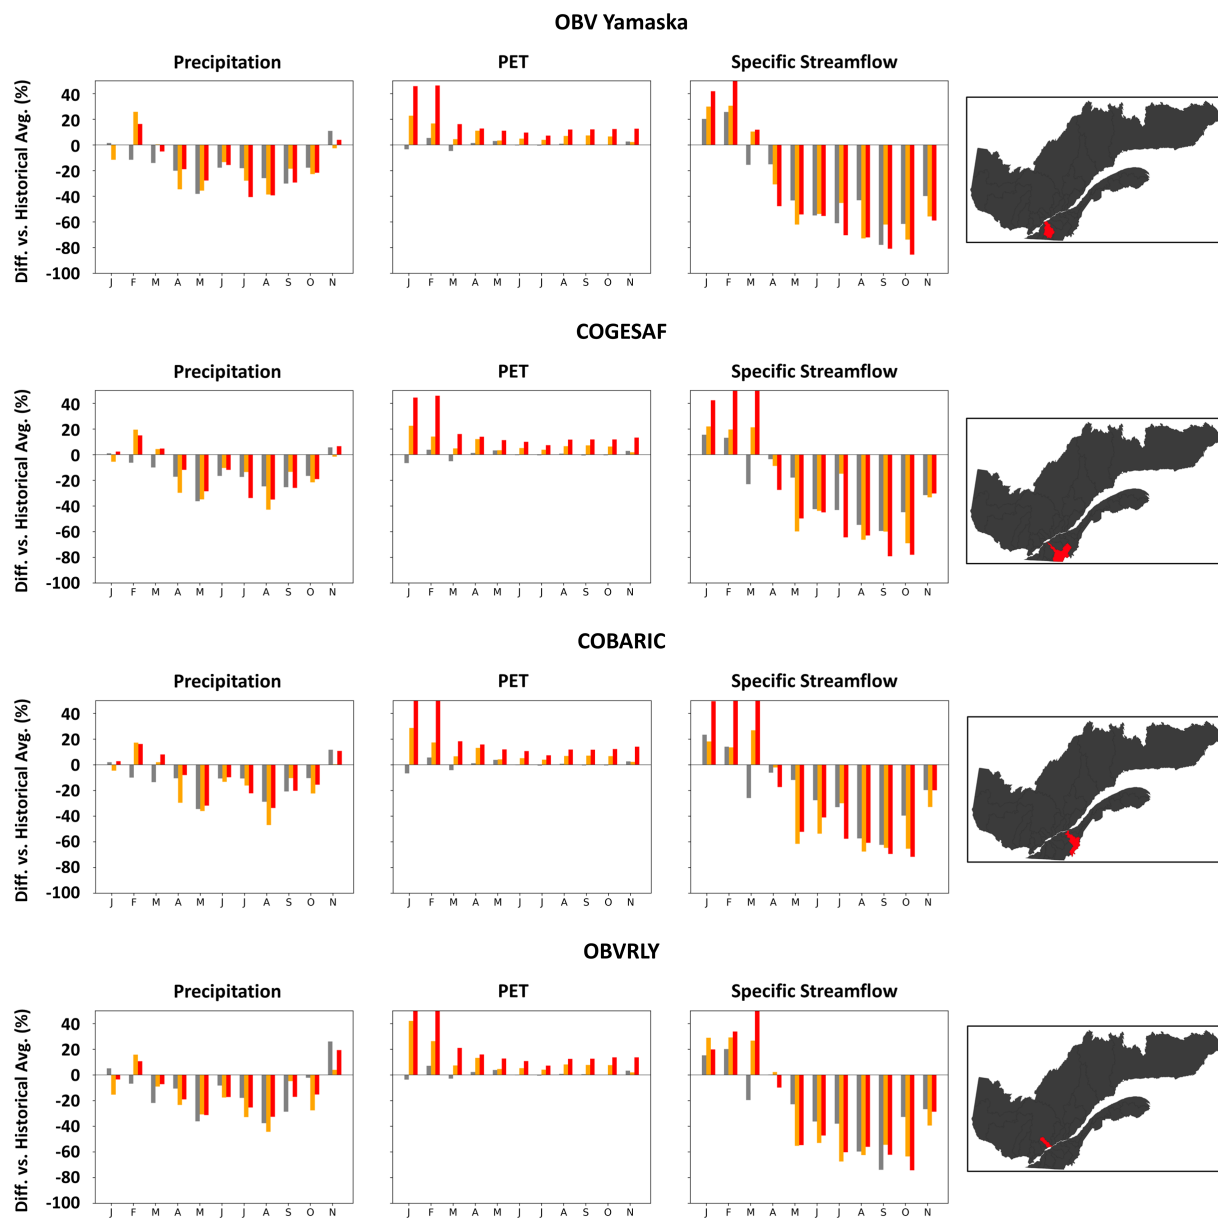

**Figure S5.** Comparison of monthly mean anomalies in precipitation, evapotranspiration and streamflow for the average of the 10 best ClimEx analogues during the historical period (grey), under +2°C (orange) and under +3°C (red).



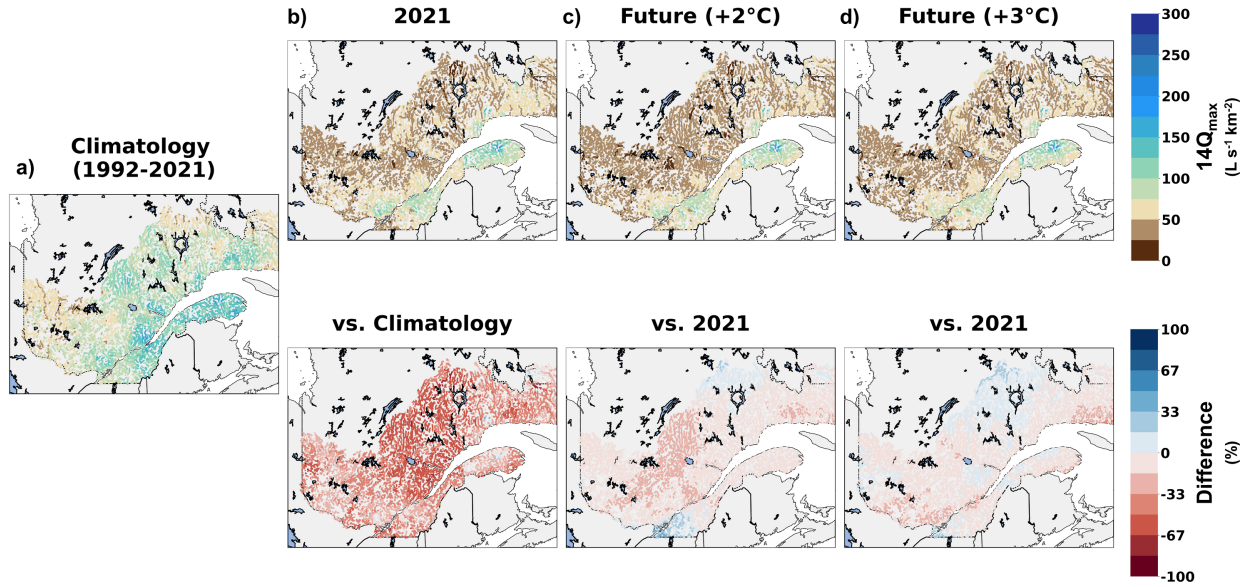

**Figure S6.** Hydrological indicator  $14Q_{max}$  for a) 1992-2021 climatology, b) in 2021, c) for the 2021 event under a +2°C global temperature rise and d) for the 2021 event under a +3°C global temperature rise. The top row displays the absolute values, whereas the bottom row illustrates the differences relative to either the climatology or the 2021 low-water episode.

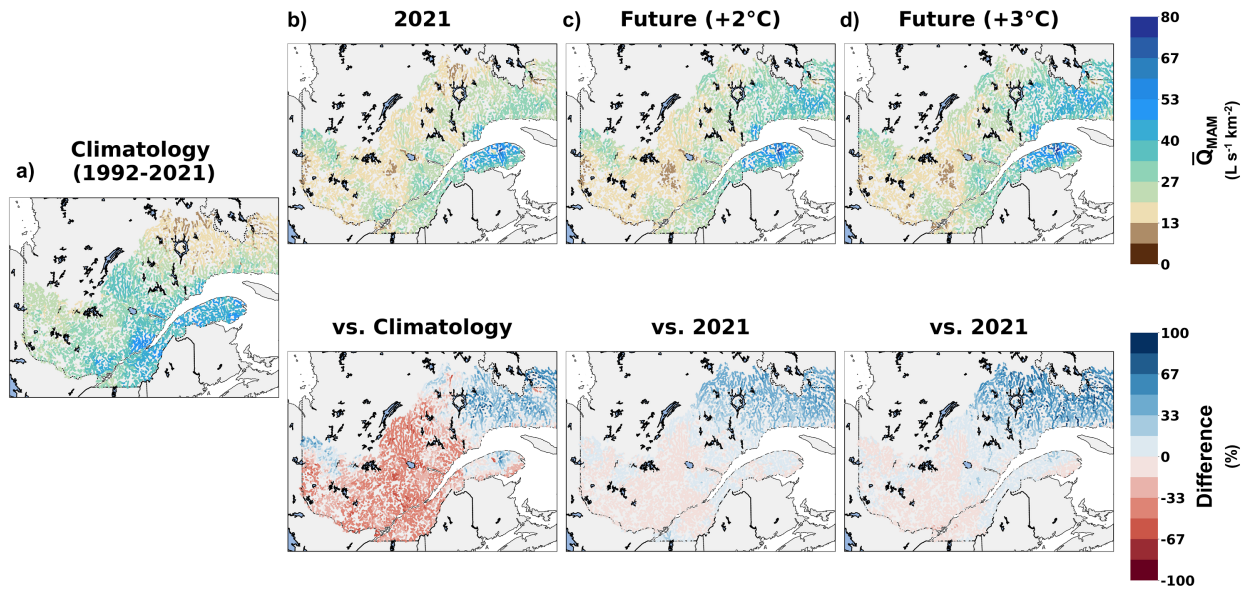

**Figure S7.** Same as Fig. S6, but for  $\overline{Q}_{MAM}$ .

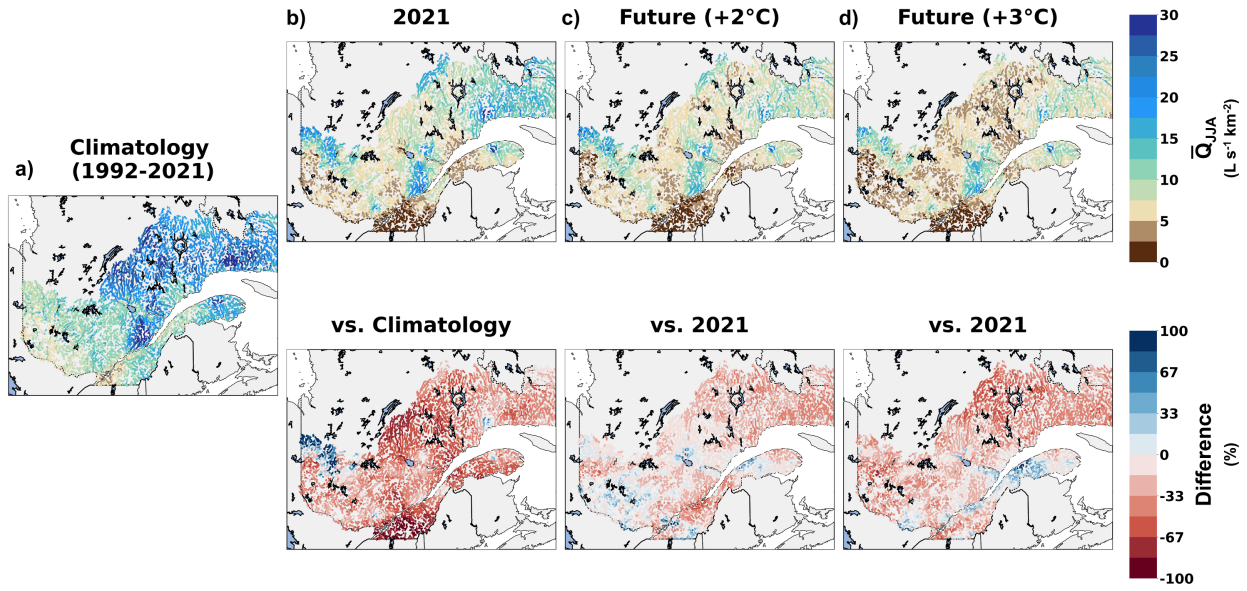

Figure S8. Same as Fig. S6, but for  $\overline{Q}_{JJA}$ .

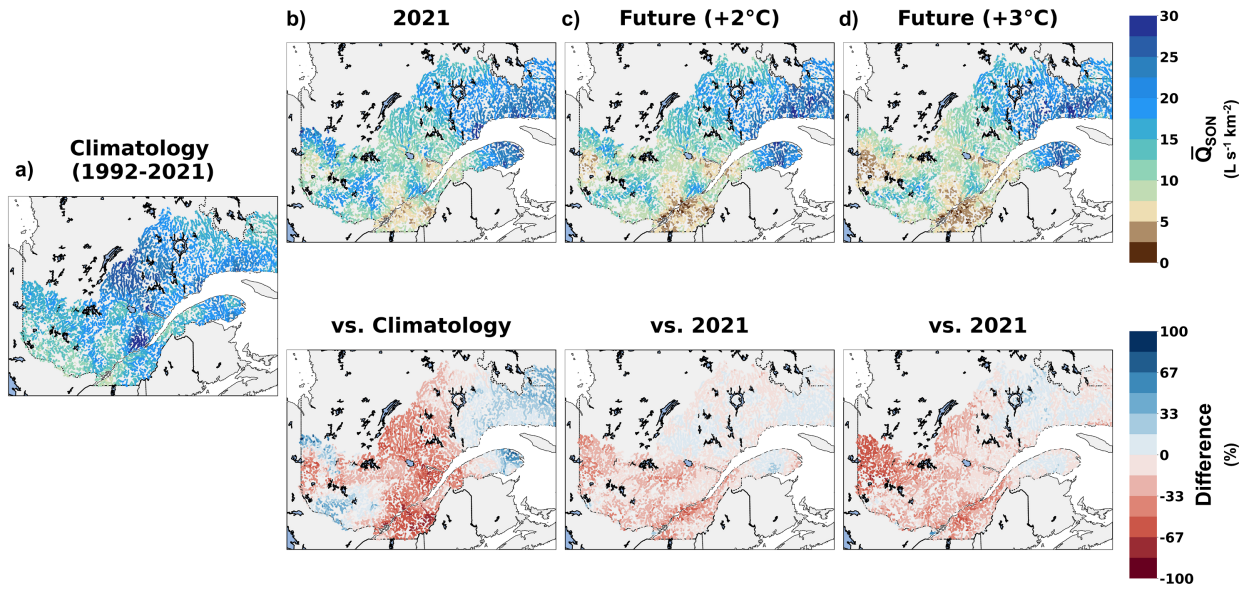

Figure S9. Same as Fig. S6, but for  $\overline{Q}_{SON}$ .

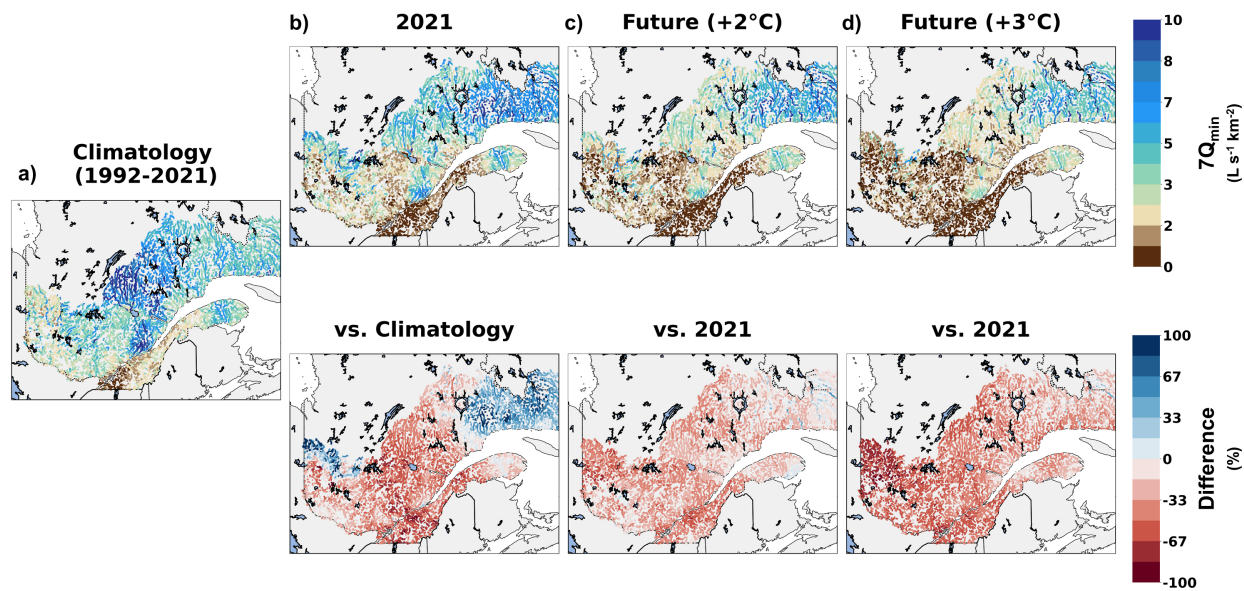

Figure S10. Same as Fig. S6, but for 7Q<sub>min</sub>.

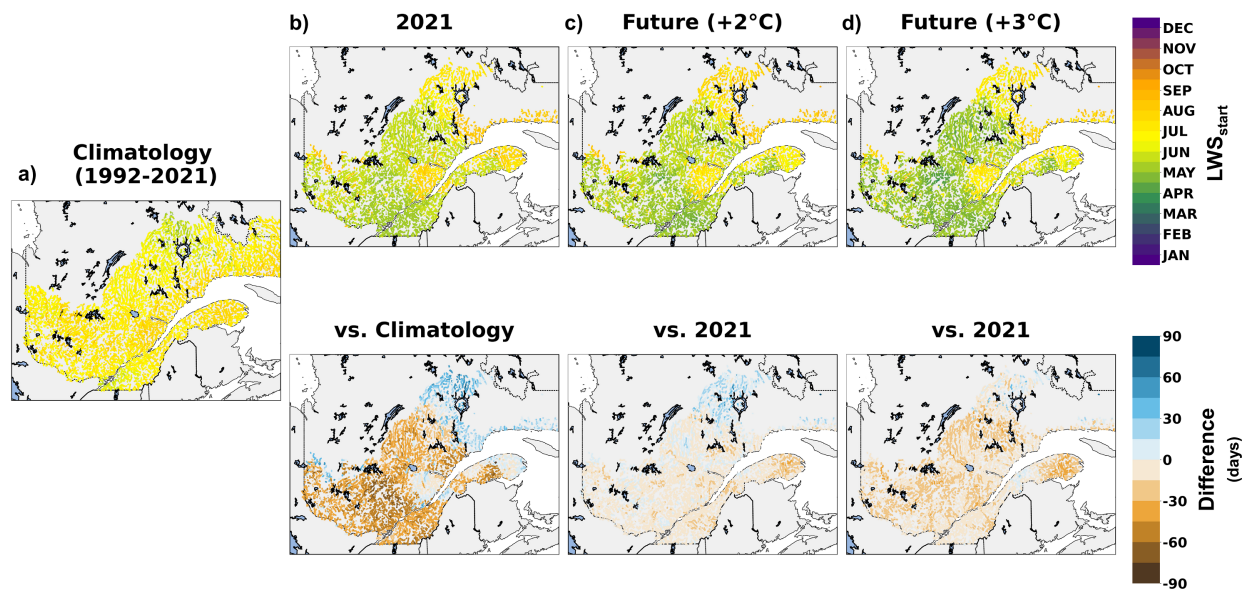

Figure S11. Same as Fig. S6, but for LWS<sub>start</sub>.



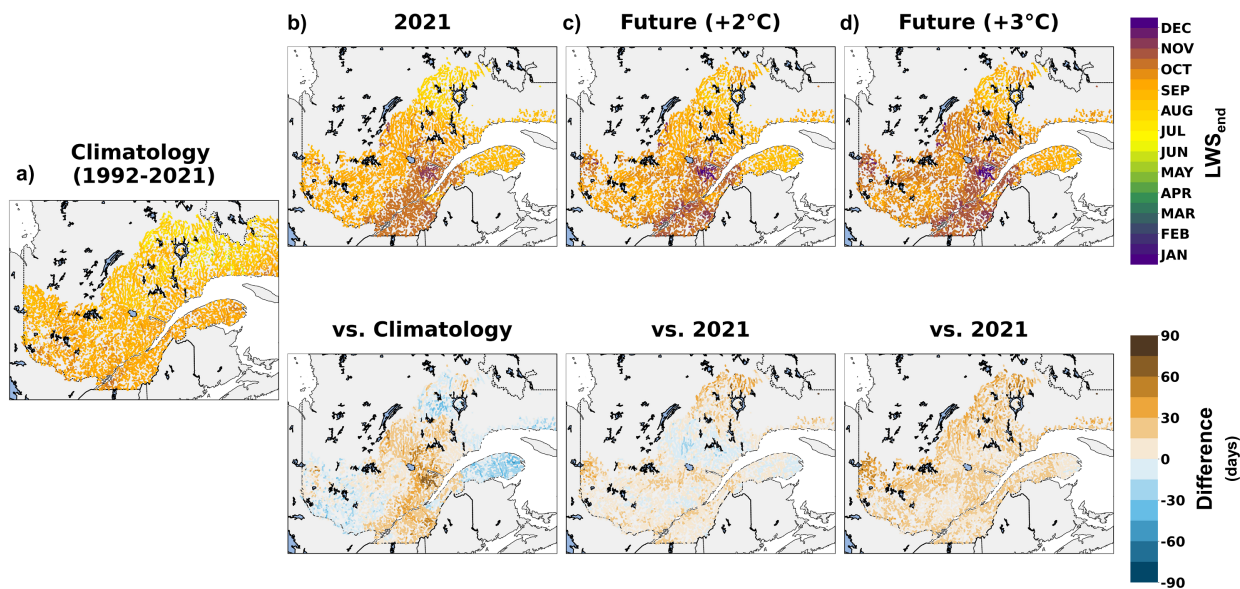

Figure S12. Same as Fig. S6, but for LWS<sub>end</sub>.

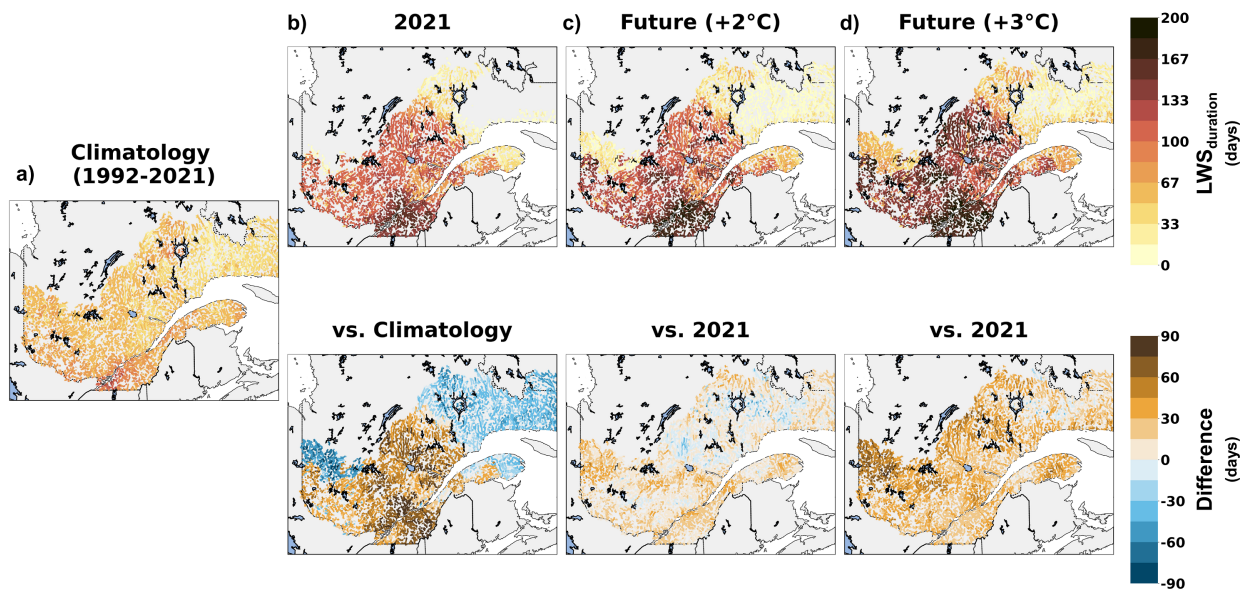

Figure S13. Same as Fig. S6, but for LWS<sub>duration</sub>.

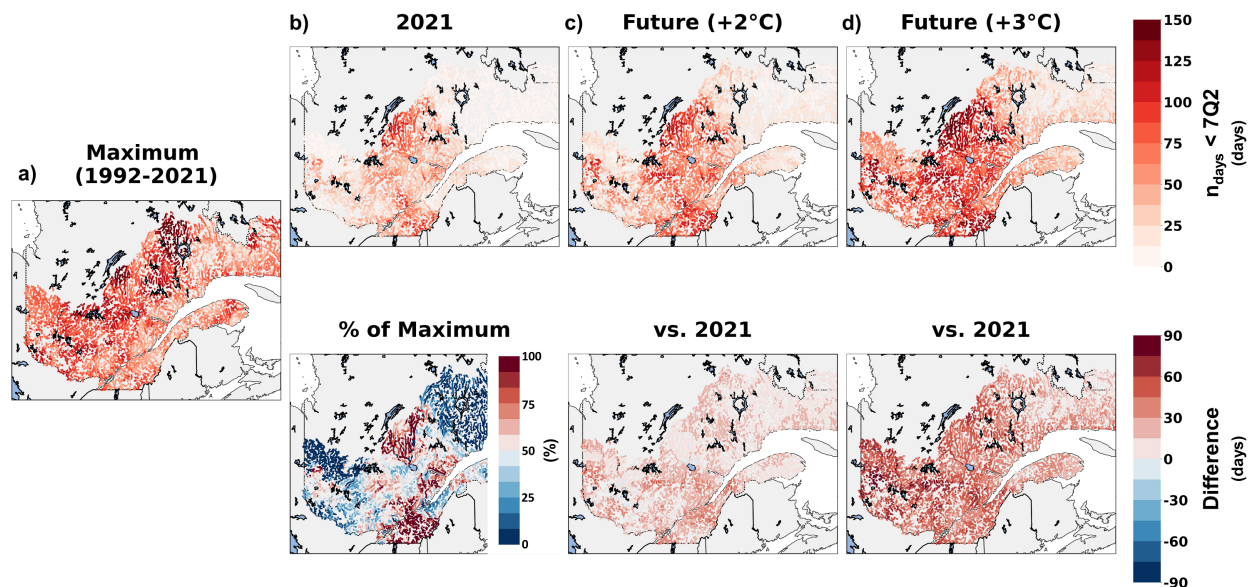

**Figure S14.** Hydrological indicator  $n_{days < 7Q2}$  for a) the maximum of the 1992-2021 period, b) in 2021, c) for the 2021 event under a +2°C global temperature rise and d) for the 2021 event under a +3°C global temperature rise. The top row displays the absolute values, whereas the bottom row illustrates the differences relative to either the historical maximum or the 2021 low-water episode.

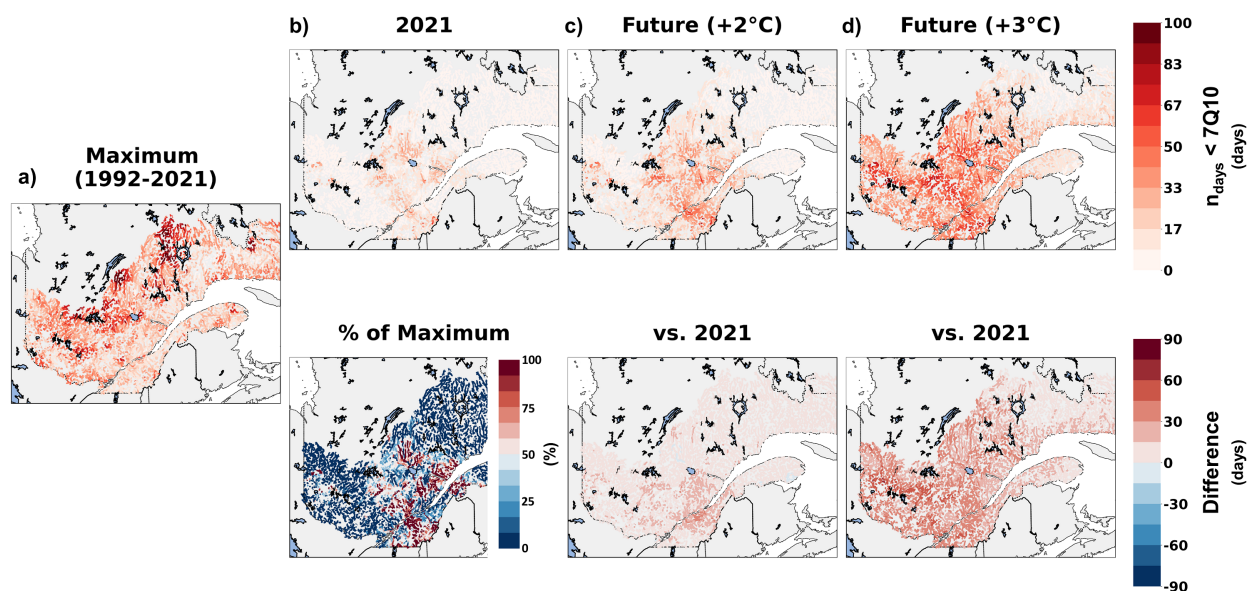

**Figure S15.** Same as Fig. S14, but for  $n_{days < 7Q10}$ .
