# Supplementary material for: Storyline analytical framework for understanding future severe low-water episodes and their consequences
Source: Copernicus journal article supplement (doi:10.5194/hess-29-4893-2025), 2025-10-01
Supplement: Supplementary file 2 [file hess-29-4893-2025-supplement.zip]

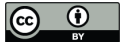

*Supplement of*

## **Storyline analytical framework for understanding future severe low-water episodes and their consequences**

**Gabriel Rondeau-Genesse et al.**

*Correspondence to:* Gabriel Rondeau-Genesse ([rondeau-genesse.gabriel@ouranos.ca](mailto:rondeau-genesse.gabriel@ouranos.ca))

- [hess-29-4893-2025-supplement-title-page.pdf](#)
- [RondeauGenesse\\_StorylineSupplementaryFigures.pdf](#)
- [RondeauGenesse\\_StorylineSupplementaryQuestionnaire.xlsx](#)

The copyright of individual parts of the supplement might differ from the article licence.
